1 **Title:**

2 **Ear pinnae in a neotropical katydid function as ultrasound guides for bat call detection**

3 **Running title:**

4 **Tympanal pinnae in katydids**

5

6 Christian Pulver<sup>1</sup>, Emine Celiker<sup>1</sup>, Charlie Woodrow<sup>1</sup>, Inga Geipel<sup>2,3,4</sup>, Carl Soulsbury<sup>1</sup>,  
7 Darron A. Cullen<sup>1</sup>, Daniel Veitch<sup>1</sup> & Fernando Montealegre-Z<sup>1,5</sup>

8

9 <sup>1</sup>University of Lincoln, School of Life Sciences, Joseph Banks Laboratories, Green Lane,  
10 Lincoln, UK, LN6 7DL

11 <sup>2</sup>Smithsonian Tropical Research Institute, Apartado 0843-03092, Balboa, Panama.

12 <sup>3</sup>CoSys Lab, Faculty of Applied Engineering, University of Antwerp, 2020 Antwerpen,  
13 Belgium

14 <sup>4</sup>Flanders Make Strategic Research Centre, 3920 Lommel, Belgium

15 <sup>5</sup>Lead contact

16 \*Correspondence: [fmontealegrez@lincoln.ac.uk](mailto:fmontealegrez@lincoln.ac.uk)

17 [eceliker@lincoln.ac.uk](mailto:eceliker@lincoln.ac.uk)

18

19 **Keywords:** Orthoptera, bioacoustics, ultrasound hearing, bat predation, cuticular pinnae,  
20 pressure – time difference receiver

21

## 22 **Abstract**

23 Early predator detection is a key component of the predator-prey arms race, and has driven the  
24 evolution of multiple animal hearing systems. Katydid (Insecta) have a sophisticated ear  
25 consisting of paired tympana on each foreleg that receive sound externally and internally,  
26 creating a pressure-time difference receiver system capable of sensitive and accurate  
27 directional hearing, despite the katydid's small size. Some katydid species have pinnae of  
28 unknown function, which form cavities around the outer tympanal surfaces and have been  
29 hypothesised to influence the external sound paths. Combining experimental biophysics and  
30 numerical modelling on 3D ear geometries, we investigated pinnae function in the  
31 katydid *Copiphora gorgonensis*. Pinnae induced large sound-pressure gains that enhanced  
32 sound detection at high ultrasonic frequencies ( $> 60$  kHz), matching the echolocation range of  
33 their nocturnal insectivorous predators. Comparing pinnal mechanics of sympatric katydid  
34 species supported these findings, and suggests that pinnae evolved primarily for enhanced  
35 predator detection.

36

## 37 **Introduction**

38 Throughout the animal kingdom, the need to localize sound signals, both to detect conspecifics  
39 and to avoid predation, is a major evolutionary selection pressure. As a result, vastly different  
40 species have convergently evolved mechanisms of hearing to fulfil similar functions<sup>1-3</sup>, and  
41 hearing organs have evolved in closely related taxonomic groups many times  
42 independently<sup>1,4,5</sup>. To determine the location of a sound source, an animal with two ears will  
43 utilize interaural time and amplitude differences. Such binaural auditory systems must satisfy  
44 three requirements to function: (1) the distance between each ear must be sufficient to produce  
45 recognisable differences in sound arrival time, (2) the ears must be separated by a body which

46 is large enough to attenuate sound between them, (3) the ears must be neurologically coupled  
47 in order to calculate time and amplitude differences<sup>6,7</sup>. However, small animals such as insects  
48 are too small to exploit diffractive effects of sound on their bodies to perceive minute  
49 differences in sound delays and intensities<sup>8</sup>. Katydid (Orthoptera: Tettigoniidae), a group with  
50 ~8,000 species<sup>9</sup>, have overcome this problem by evolving independently functioning ears in  
51 their forelegs<sup>10</sup>, thereby increasing the interaural distance. Many species have also evolved the  
52 ability to produce and detect ultrasonic frequencies<sup>11</sup>, meaning that the resulting distance  
53 between the ears provides sufficient spatial separation to exceed the shorter wavelengths of  
54 incoming conspecific sounds<sup>2</sup>. Each tettigoniid ear receives sound directly at the external  
55 tympanal surface, but also internally in a process similar to that of the mammalian ear. In this  
56 internal process, sound enters an air-filled ear canal (EC, also called acoustic trachea) through  
57 a specialised opening in the prothorax known as the acoustic spiracle<sup>12</sup>. The EC's narrowing,  
58 exponential horn shape amplifies the sound signals<sup>13-20</sup> and reduces propagation velocity<sup>13,14,20</sup>,  
59 and leads this decelerated sound signal through the thorax and foreleg to the internal tympanal  
60 surface. The combined internal and external inputs means that the tettigoniid ear functions as  
61 a pressure – time difference receiver<sup>2,13-21</sup>, unlike the mammalian ear which functions as a  
62 single input pressure receiver via the EC.

63 At the external auditory input, some tettigoniids also possess cuticular pinnae (also referred to  
64 as folds, flaps or tympanal covers) partially enclosing their tympana (Fig. 1a-c). Early  
65 observations by Autrum suggested that the cuticular pinnae aided the insect to determine the  
66 direction of sound, effectively acting as a sound guide<sup>22,23</sup>. The prominence of cuticular pinnae  
67 present in a variety of Pseudophyllinae and Conocephalinae species (see examples in the  
68 Supplementary Fig. S1a and S1c-k) generated more interest in these observations.  
69 Morphologies of cuticular pinnae vary greatly between species, and were originally categorized  
70 in a phylogenetic context<sup>10</sup>. A dual functioning auditory system in the tettigoniid *Mygalopsis*

71 *marki* was proposed to explain differences in the auditory morphologies in spiracle size and  
72 tympanal pinnae in which the external tympanal ports appears to function as omnidirectional  
73 receivers and the EC combined with the spiracle operate as a highly sensitive non-directional  
74 receiver<sup>24</sup>. These findings were corroborated in *Hemisaga* sp. where it demonstrated increased  
75 acoustic sensitivity at the external tympanal port (through blocking the entrances or slits from  
76 here forth) <sup>25</sup>. A dual channel system consisting of the EC and spiracle serve for the detection  
77 of predators, whilst the external tympanal ports are used for detecting conspecific  
78 communication signals<sup>25</sup>. Studies of ultrasonic rainforest Pseudophyllinae provided more  
79 evidence of principal sound reception for conspecific communication using the external  
80 tympanal port as a consequence of exceptionally small spiracle sizes<sup>26</sup>. It was reported that  
81 diffraction of very short wavelengths along the tympanal slits contributed to directional  
82 orientation in rainforest katydids<sup>26</sup>.

83 Despite these findings, the role of cuticular pinnae has been subject to considerable debate in  
84 the literature. Before experimental evidence of the dual port system in katydids was  
85 published<sup>13,20</sup>, attention was given to the EC as the main port for sound capture<sup>18,27-31</sup>.  
86 Moreover, it has been argued that the size of the ear is considerably smaller than the  
87 wavelengths of most carrier frequencies of described insects known at the time, and therefore  
88 the sound pressure field around the ear would be constant and yield no directional cues<sup>28</sup>. In  
89 other words, sound accessing the external tympanal port is not related to the direction of  
90 incidence, and tympanal pinnae are merely protective features sheltering the fragile tympanum.  
91 However, recent research showed that quieter, low amplitude sound waves acting on the  
92 external tympanal membrane (without gain from the EC) of the neotropical katydid *Copiphora*  
93 *gorgonensis* (Tettigoniidae: Copiphorini) do cause vibrations of significant amplitude in the  
94 inner ear<sup>32</sup>. Therefore, even these very weak vibrations are mechanically transduced. The  
95 external sound arrives 60-80  $\mu$ s before its amplified form of self on the internal tympanal

96 surface via EC, and this significant phase delay forms the basis of the pressure – time difference  
97 receiver definition<sup>13,14</sup>. In katydids with cuticular pinnae surrounding the tympana, evidence  
98 suggests that the insect can use both ports, but how the external port contributes to  
99 directionality remains unknown<sup>33</sup>.

100 Here, we investigate the role of cuticular pinnae using the neotropical katydid *Copiphora*  
101 *gorgonensis*, a species endemic to Gorgona, an island in the Pacific Ocean off the western coast  
102 of Colombia<sup>34</sup>. *Copiphora gorgonensis* has become a model species for hearing studies due to  
103 the transparency of the cuticle which facilitates non-invasive, real-time measurements of the  
104 inner ear<sup>32,35</sup>. We integrated experimental biophysical measurements based on micro –  
105 scanning laser Doppler vibrometry (LDV) and micro-computed tomography to simulate the  
106 function of the cuticular pinnae and how they contribute to auditory orientation in this katydid.  
107 The coupling of these approaches were applied to 3-dimensional (3D) print models of the ear,  
108 and scaled experiments were performed to validate the simulations. We investigated if: (1) the  
109 direction of incidence of the sound stimulus, presented by a loudspeaker, is a function of the  
110 sound wave directly accessing the tympana through the slits; (2) the tympanal cavities produce  
111 sound pressure gains that act externally on the tympana; (3) tuning properties of the pinnal  
112 cavities are a result of pinnal geometry and can be predicted by the volume and/or entrance  
113 size of the cavity.

114 Based on Autrum’s original observations, we hypothesized that tympanal pinnae function as  
115 ultrasonic guides by pinnae forming exceptionally small resonant cavities. Further, we  
116 hypothesized that these cavities act as Helmholtz-like resonators able to capture and amplify  
117 diminishing ultra-high frequency waves.

118

119 **Results**

120 ***Time domain response of the external tympanal port***

121 We investigated the role of tympanal pinnae in sound capture by testing how the direction of  
122 incidence of the sound stimulus presented by the loudspeaker induced tympanal displacements  
123 at three frequencies (23, 40 and 60 kHz) with the cuticular pinnae intact and later ablated.  
124 Frequencies above 60 kHz were not tested provided the limitations of experimental equipment  
125 (see methods for *vibration measurements*). A total of 2,736 measurements were performed on  
126 13 ears (1,512 measurements for male specimens; 1,224 for female specimens). For time to  
127 sound arrival, we found a significant interaction between the presence of cuticular pinnae with  
128 angle of incidence and with frequency (Supplementary Table S1). Post hoc analysis showed  
129 the presence of pinnae significantly slowed the time of arrival at 23 kHz (t-ratio = -11.15,  $P <$   
130 0.001) and 40 kHz (t-ratio = -7.43,  $P <$  0.001), but not at 60 kHz (t-ratio = -1.86,  $P =$  0.063;  
131 Fig. 2b). The effect of tympanum on time of arrival and displacement amplitudes was found to  
132 be significant (Supplementary Table S1).

133 For displacement amplitude, there was a significant interaction between the presence of pinnae  
134 and frequency (Supplementary Table S1). Post hoc analysis showed greatest displacement  
135 amplitudes at 23 kHz with the pinnae ablated (t-ratio = 3.20,  $P <$  0.001; Fig. 2c), which  
136 demonstrates that pinnae do not enhance auditory perception of the carrier frequency in *C.*  
137 *gorgonensis*, and that the tympanum achieves this displacement by resonance (see<sup>13,35</sup>). There  
138 were no differences at either 40 kHz (t-ratio = 0.84,  $P =$  0.399; Fig. 2c) and 60 kHz (t-ratio = -  
139 0.61,  $P =$  0.540; Fig. 2c). We also found a significant interaction between the presence of  
140 cuticular pinnae with angle of incidence showing the impact of pinnae in increasing arrival  
141 time as the sound source rotates opposite the ear (Supplementary Table S1). Responses were  
142 strongest for sound presented perpendicular to each respective slit cavity with the area of the  
143 cuticular septum bifurcating the cavities, also referred as “point zero,” obtaining the lowest  
144 displacement amplitudes with the pinnae intact due to cuticle obstructing the response of the

145 tympanal membrane . Contrarily, point zero showed the greatest displacement amplitude with  
146 the pinnae ablated with incident angles on either side of point zero showing a gradual subdued  
147 response to the stimulus.

148

### 149 *Anatomical measurements of the external tympanal port*

150 The anatomical features of the ear were measured to predict resonance and compare  
151 intraspecific variation in pinna size. 2D measurements of the area of the pinnal opening (slit),  
152 distance between the centre of the ear (septum) and edge of the pinna (pinnal protrusion), and  
153 distance between slits (septum width) were studied using an Alicona Infinite Focus microscope  
154 ( $n = 8$ ). We found that the size of the slit was not significantly different between the ATM and  
155 PTM (Wilcoxon paired rank sum test,  $P = 0.958$ ). The pinnal protrusion length showed that  
156 the PTM pinnae were significantly wider than the ATM (two sample  $t$  test,  $t(14) = -4.64$ ,  $P <$   
157  $0.001$ ).

158 The 3D measurements of the tympanal cavity volumes and cross section of the ears showed  
159 that the PTM cavity volume was slightly larger than the ATM volume, but insignificant  
160 (Wilcoxon paired rank sum test,  $P = 0.958$ ). The mean cross-sectional width of the ear was  
161  $1.143 \text{ mm} \pm 0.353$  ( $n = 8$ ).

162

### 163 *Tympanal cavity resonance calculations*

164 We used the 2D (slit area) and 3D measurements (cavity volume) to estimate resonance of the  
165 tympanal cavities (Supplementary Table S2). This was calculated with the assumption that the  
166 slit openings are a perfect circle (to determine radius) and the cavity acts as a cylindrical tube  
167 using a neckless Helmholtz resonance equation. Here,  $c$  is speed of sound in air ( $343 \text{ m s}^{-1}$ ),  $S$

168 is cross-sectional area of the opening with radius  $r$ ,  $1.85$  is the correction length of the neck  
169 and  $V$  denotes the volume of the resonator / cavity<sup>36</sup>.

$$170 \quad f(h) = \frac{c}{2\pi} \sqrt{\frac{1.85r}{V}}$$

171 The pinna cavities ( $n = 8$ ) showed a neckless Helmholtz resonance of  $94.280 \pm 3.532$  kHz for  
172 the ATM and  $91.694 \pm 3.929$  kHz for the PTM (Wilcoxon paired rank sum test,  $P = 0.093$ ).

173

### 174 ***3D printed model time and frequency domain measurements***

175 3D printed scaled models of the ear were subjected to acoustic experimentation to measure  
176 gain and resonance. 3D ears were printed at a scale of 1:11.43 and stimuli was scaled by the  
177 same factor for pure tones (2.01 kHz for 23 kHz, 3.50 kHz for 40 kHz, 5.25 kHz for 60 kHz,  
178 and 9.63 kHz for 110 kHz) and for broadband (2-15 kHz for 11.5-170 kHz). The interaction  
179 between pinnae and frequency significantly affected sound pressure (dB), whilst tympanum  
180 did not (Supplementary Table S1). Across all frequencies, the presence of pinnae increased  
181 sound pressure, but differences were greatest at higher frequencies (23 kHz: t-ratio = -2.54,  $P$   
182 = 0.014; 40 kHz: t-ratio = -8.69,  $P < 0.001$ ; 60 kHz t-ratio = -15.66,  $P < 0.001$ ; 110 kHz t-ratio  
183 = 41.70,  $P < 0.001$ ; Fig. 3a). More specifically, the greatest pressure gains were detected at  
184 104.65 kHz for both the ATM (24.19 dB) and PTM (27.68 dB) with the pinnae intact. With the  
185 pinnae ablated, the greatest pressure gain was found to be 97.98 kHz for both the ATM (8.04  
186 dB) and PTM (7.81 dB).

187

### 188 ***Numerical results***



189 Using real 3D geometries of each experimental ear, we used Finite Element Analysis (FEA) to  
190 simulate sound pressure gains at frequencies exceeding the experimental limitations on living  
191 specimens. For sound pressure measurements there was a significant interaction between the  
192 presence of pinnae and frequency (Supplementary Table S1). At 23 kHz ears without pinnae  
193 had significantly higher sound pressures (t-ratio = 3.45,  $P < 0.001$ ), but the effect was reversed  
194 at 40 kHz (t-ratio = -5.94,  $P < 0.001$ ) and 60 kHz (t-ratio = -28.52,  $P < 0.001$ ), with differences  
195 increasing as frequency increased (Fig. 2d). There was no effect of angle of sound incidence  
196 or tympanum on sound pressures (Supplementary Table S1).

197 Simulated sound pressure gains (Figs. 4c and 4d), and their distribution maps (Fig. 4a and 4b)  
198 showed the greatest sound pressure gain at a mean value of ~118 kHz (ATM mean 121 kHz,  
199 PTM mean 115 kHz), and such gains were reduced or lost entirely when the pinnae were  
200 removed (Supplementary Table S1; Fig. 4d).

201 The effects of angle, pinnae, tympanum, interaction of angle and pinnae, and the interaction of  
202 pinnae and frequency were not significant on arrival times (Fig. 2e).

### 203 ***Behavioral and tympanal response to broadband stimulation***

204 For broad tympanal responses, we exposed seven specimens to broadband periodic chirps  
205 stimulation in the range 20-120 kHz in a free sound field and recorded the vibration of both  
206 ATM and PTM, of the two ears using a micro-scanning laser Doppler vibrometer. Pinnae  
207 induced sound pressure produced a relatively stable response (measured as velocity per sound  
208 pressure) of the tympanal membranes between 20-70 kHz, however above 80 kHz the tympana  
209 response increased dramatically with ultrasonic resonant peaks at ~107 kHz for the ATM and  
210 ~109 kHz for the PTM (Fig. 5a).

211 Behavioural audiograms were obtained from nine tethered females walking on a treadmill.  
212 Audiograms were obtained with stimuli in the range 20-120 kHz, as this species is entirely

213 ultrasonic (males call with a 23 kHz pure tone). Audiograms show that the startle response of  
214 females decline sharply for stimuli between 20 kHz and 35 kHz, however, response remains  
215 essentially constant at higher frequencies (Table S3; Fig. 5b).

216

## 217 **Discussion**

218 To understand the function of cuticular pinnae of katydid ears, we conducted acoustic  
219 experiments on living specimens and used micro-CT to produce images for numerical  
220 modelling using accurate ear geometries, and to print 3D scaled ears for additional acoustic  
221 experiments. In all our experiments, pinnae had a significant effect on the sound reception at  
222 the tympana. Pinnae significantly enhanced cavity-induced pressure gains in live specimens at  
223 60 kHz (the maximum frequency achieved with the experimental platform for living  
224 specimens). Further, the extent of the pinnal contribution to tympanal displacement amplitude  
225 depended on the incident angle of the sound source at tested frequencies  $\leq 60$  kHz. The  
226 tympana of *C. gorgonensis* naturally resonates at ca 23 kHz, which shows high sensitivity to  
227 the dominant frequency of the male calling song<sup>34,37</sup>. This was also observed in our  
228 experimental results, irrespective of pinnal presence or absence. At ultrasonic frequencies, the  
229 pinnae-enclosed tympanal membrane of *C. gorgonensis* show strong mechanical vibrations  
230 induced by the resonances of the tympanal cavities (Fig. 5a). This suggests that tympanal  
231 pinnae enhance sound pressure and sensitivity to high frequencies. It was previously  
232 demonstrated that even minuscule tympanal displacements in *C. gorgonensis* create large  
233 displacement of the *crista acustica* (CA)<sup>32</sup>. Tympanal displacements are nearly duplicated in  
234 the CA as the effect of the lever action imposed by the vibration of the tympanum measured  
235 though transparent cuticle<sup>35</sup>. Comparable findings can be inferred from LDV experiments on  
236 the katydid *Mecopoda elongata*, with its CA exposed<sup>38</sup>. Insect mechanosensory auditory

237 neurons are capable of detecting exquisitely small mechanical displacements, down to 100  
238 pm<sup>39</sup>, close to the theoretical limits of sensitivity<sup>40</sup>. Therefore, the sound pressure gain induced  
239 by the tympanal pinnae at ultrasonic frequencies (> 60 kHz; Fig. 3a and Fig. 5a) should produce  
240 sufficient tympanal displacement without EC amplification to create a response in the auditory  
241 receptors. Recordings from the T-cell in *Tettigonia viridissima* (another katydid with tympanal  
242 pinnae) show a broad sensitivity in the range 5-90 kHz<sup>41</sup>.

243 As a result of probe-speaker limitations and reflections from the specialised platform in our  
244 live time domain experiments, we were unable to test frequencies above 60 kHz. We  
245 compensated by performing numerical simulations on 3D computer geometries of  
246 experimental ears to predict pressure gains; 3D printing ear models to confirm resonance and  
247 pressure gain; and recording experimental free field vibrating tympana. Our numerical  
248 simulations predicted sound pressure gains in the frequency range of 50 – 150 kHz with mean  
249 resonant frequencies of 115 kHz and 121 kHz in the PTM and ATM cavities, respectively (Fig.  
250 4c). Between 50–60 kHz, detectable pressure gains inside the cavity started to act along the  
251 external tympanal membrane with the best gain of about 23 dB found at resonant frequencies.  
252 We did not compare the tympanal response between the experimental and numerical data  
253 directly, due to the simplifying assumption in the numerical models that the tympana are  
254 composed of homogeneous material. In reality, the tympanal layer is composed of materially  
255 different layers where the external surface has more chitinous, sclerotized layers extending  
256 from the tympanal plate to the membrane, while the internal membrane is composed of elastic,  
257 tracheal derived material. To overcome this, we measured tympanal vibrations to extreme  
258 ultrasound in free field conditions to validate both the numerical and 3D print model results.

259 To test the influence of pinna geometry alone on these ultrasonic gains, we 3D printed ears and  
260 scaled the sound stimuli to match the ear size. The mean resonance of the 3D printed models  
261 was found to be ~105 kHz (Fig. 4e). Differences between the numerical and 3D print models

262 results can be attributed to the material properties (Young's modulus of printing resin)  
263 incorporated for the tympana in the models. When we simulated these material properties of  
264 the 3D ears, the resonant frequencies dropped to ~111 kHz (ATM 112.5 kHz, PTM 109.5 kHz;  
265 Supplementary Fig. S2) which is close to the high frequency resonance of the tympana when  
266 the pinnae are intact (107.5 kHz; Fig. 5a). Without the pinnae, pressure gains were dramatically  
267 reduced in the simulations. Additionally, a slight resonance was found in both the numerical  
268 simulations and 3D print models caused by the incomplete ablation of the pinnal structures  
269 (Figs. 3d and 3f).

270

### 271 *Ultrasound guides in insects*

272 Pinnae-covered tympanal ears are also found in some prominent moths (Notodontidae), with  
273 eardrums mechanically tuned to detect the high frequencies used by hunting bats<sup>42</sup>. Cup-like  
274 pinnae from the metathorax are suggested to enhance the reflection of sounds onto the tympanic  
275 membrane<sup>44</sup>. With the pinnae ablated, these moths entirely lost the ability to localise sound at  
276 all frequencies<sup>43</sup>. Therefore, katydids and certain moths seem to have independently evolved  
277 pinnal adaptations for detecting bat ultrasounds.

278 High frequency singers of the katydid subfamily Pseudophyllinae generally have very small  
279 spiracles, long but narrow ECs, and tympana covered with various forms of cuticular pinnae<sup>44</sup>.  
280 Pseudophyllines with song frequencies greater than 50 kHz have been shown to depend more  
281 on external than internal sound reception for communicating with conspecifics<sup>24–26,45</sup>. The  
282 dominant port for hearing relies on the tympanal slit to spiracle size area ratio where the larger  
283 opening dictates principal auditory input in ultrasonic hearing rainforest pseudophyllines<sup>26</sup>. In  
284 *C. gorgonensis*, the spiracle area is large, naturally open on average three times larger than the  
285 total area of the tympanal slit (1 mm<sup>2</sup> : 0.3 mm<sup>2</sup>) which is inversely related to the scale of

286 pseudophyllines. Nevertheless, reflectance and power transmittance inside the tympanal pinnal  
287 cavities experience different acoustics dynamics than the EC. Power transmittance of ultrasonic  
288 frequencies suffer significant attenuation as a result of high reflectance of sound waves along  
289 the narrowing EC in *C. gorgonensis*<sup>46</sup>.

290 By concentrating or funnelling ultrasonic sound into the tympanal cavity, the pinnae enhance  
291 ultrasonic reception of incidental sounds. The cavity induced pressure gains are the  
292 consequence of geometry of the tympanal slit in relation to the geometry and volume of the  
293 cavity (Supplementary Table S2). These imparted forces are magnified by the motion of the  
294 tympanum. The resonances afforded by the pinnal structures are evident as both the numerical  
295 and 3D print models do not include a vibrating tympanum. In *C. gorgonensis*, irrespective of  
296 incident sound pressure magnitude, the cavities provide a consistent pressure gain of at least  
297 16 dB within the frequency range 100 – 120 kHz (Fig. 4c). This is in contrast to tympanate  
298 moths that depend on the incident sound intensity for mechanical tuning of high frequency bat  
299 calls<sup>42,43,47</sup> to produce gains up to 16 dB<sup>43</sup>.

300 Though the slit openings to both cavities are perceptively indistinguishable and statistically  
301 insignificant to each other, the ATM slit opening is slightly larger than that of the PTM, but  
302 the PTM has a larger cavity volume. These minuscule discrepancies cause differences in  
303 pressure gains and resonances between both sides. In *C. gorgonensis*, the PTM pinnal structure  
304 is approximately 13% wider than the ATM. This increases the micro-acoustical diffraction of  
305 ultrasonic frequencies entering the PTM cavity. Similar pinnal asymmetries were observed in  
306 the katydid *Oxyecous lesnei* but the ATM structure was much larger than the PTM which  
307 suggests that each tympanum is differentially tuned (for other examples see Fig. 1<sup>48</sup>;  
308 Supplementary Fig. S3)<sup>49</sup>. Here, we showed that the tympanal cavities and their asymmetric  
309 openings act as Helmholtz resonators at frequencies of 94.28 kHz for the ATM and 91.594 kHz  
310 for the PTM in *C. gorgonensis*. Though the simulations show a peak of 118 kHz (ATM 121

311 kHz, PTM 115 kHz), the Helmholtz calculation assumes the slit opening is a circle and the  
312 cavity is a solid walled sphere. Pressure distribution maps from the numerical models suggest  
313 that at 110 kHz (see Fig. 4a), the resonance of the pinnae may function in a piston motion,  
314 whereby fluctuating air movements are present at the opening of each independent cavity: an  
315 observation characteristic of Helmholtz resonance (Supplementary Materials Section 2: Video  
316 2). Sound pressure gains inside the 3D printed model tympanal cavities and resonances closely  
317 matched the simulated numerical models (Fig. 4c and 4e), showing a net average sound  
318 pressure gain of 16.1 dB for the ATM and 19.87 dB for the PTM at 105 kHz.

319 The asymmetry of the tympanal cavities have an acoustic function. Our results show that pinnae  
320 cause intra-aural time differences and oscillation phase shifts at ultrasonic frequencies between  
321 vibrations in the ATM and PTM (Fig. 2a). This contributes to differences of intensity and  
322 arrival of sound that induce pressure gains of ultrasonic frequencies (Fig. 4c and Fig. 5a).  
323 Differential tympanal mechanical responses have also been found in the pinnae possessing  
324 paleotropical katydid *Onomarchus uninotatus* where the ATM exhibits tuning to the  
325 conspecific call and the PTM's response is tuned to higher frequencies suggesting a possible  
326 use in predator detection<sup>50</sup>. The ATM and PTM of *C. gorgonensis* show differential responses  
327 to ultrasonic frequencies (Fig. 4c, Fig. 5a), but how these two signals are transduced in the  
328 same auditory sensilla for potential directional hearing remains unknown, as both membranes  
329 share the same CA. Not only do pinnal structures provide a long diffractive edge for sound  
330 waves, but the dorso-ventral asymmetry between the ATM and PTM pinnae. We argue that it  
331 is also possible for asymmetries within a single ear to function in the same way, including at  
332 frequencies emitted by hunting bats, however our data do not support the idea of a single ear  
333 being directional at least in the range 20-60 kHz (which include the specific calling frequency  
334 at 23 kHz). Considering that the tettigoniid ear is capable of resolving such small differences  
335 in time and intensity between the two ears<sup>10,49</sup>, it could resolve the direction of an attacking

336 bat and evoke ultrasound-triggered defensive behaviour<sup>51</sup>. The behavioural and ecological  
337 relevance of potential directional hearing using a single ear constitutes an outstanding question  
338 and will be the subject of future studies.

339 In *C. gorgonensis*, the dual inputs of the spiracle and the external port (the pinnae) function as  
340 a sound pressure gain compensation system. As previously shown for *C. gorgonensis*<sup>46</sup>, and in  
341 other species<sup>20,44</sup>, the spiracular port and the EC with its exponential horn geometry act as a  
342 bandpass filter limited in providing pressure gains to high ultrasonic frequencies (> 50 kHz,  
343 for *C. gorgonensis*)<sup>14,15</sup> and designed to enhance detection of the specific carrier frequency.  
344 The effect of the EC geometry in reducing sound velocity is as much as ~20% or ca 60  $\mu$ s, and  
345 coupled with the contralateral EC, collectively a total of eight inputs are possible with each  
346 causing a vibration with variable delays in four internal and four external tympanal surfaces to  
347 the same stimulus<sup>14</sup>. Though the reduction in velocity contributes exceptional binaural  
348 directional cues, the external port provides real-time sensitivity to exploit fading bat  
349 ultrasounds. Ear pinnae act as extreme ultrasonic guides that resonate at frequencies closer to  
350 the high frequency components at start of the echolocation sweep of common bat predators.  
351 Hence the EC might be a less efficient method of bat detection as the angle of incidence  
352 accompanied by time delays could shorten reaction times and obfuscate the localisation of the  
353 predator.

354

### 355 ***Bat detection by resonance***

356 It has been shown that katydids form a key part of the diet of many insectivorous species in  
357 various regions of world<sup>52-59</sup>. However such ecological interactions have been more intensively  
358 studied in the Neotropical regions. Gorgona Island is home to over 33 bat species with many  
359 remaining undescribed and underrepresented in wildlife inventories, including least three

360 substrate gleaning bats of the family Phyllostomidae<sup>60</sup>. Neotropical katydids have evolved  
361 sophisticated auditory features as strategies for survival against substrate gleaning bats<sup>61–65</sup>.  
362 The habitat of *C. gorgonensis* is in cluttered vegetation of the tropical forest understory<sup>66</sup>. In  
363 this environment, acoustic signals are heavily attenuated which leads to significant  
364 transmission loss<sup>41,67</sup>, but insects have evolved sophisticated receivers to perform call  
365 discrimination in these acoustically challenging environments<sup>68</sup>. Acoustic adaptations by  
366 katydids to evade bat predation include the use of narrow bandwidths, high carrier frequencies,  
367 and sporadic calling in order to diminish signal proliferation in the environment<sup>61,69–71</sup>, and  
368 ergo evade eavesdropping by bats<sup>72</sup>. Certain adaptations are a trade-off as the katydid becomes  
369 more conspicuous and vulnerable to other predators as the communication method changes.  
370 For example, katydids that perform vibrotaxis, even tremulations can likely attract spiders,  
371 scorpions<sup>73</sup> and primates, as well as bats<sup>74,75</sup>. Likewise, bats foraging at this level also face  
372 similar acoustic shortcomings, affecting their echolocation abilities<sup>76</sup>. Thus, several  
373 phyllostomid substrate gleaning bats are very well adapted to listen to prey-produced sounds  
374 like rustling noises or mating calls of, e.g., male katydids<sup>61,77</sup>. However, at least one gleaning  
375 bat species, *Micronycteris microtis* (Phyllostomidae), uses a sophisticated echolocation  
376 strategy to discriminate the location of katydids concealed in vegetation<sup>78,79</sup> (Fig. 6). Despite  
377 passive acoustic defences, calling from restrictive locations and equipped with very large  
378 mandibles and sharp fastigia, katydids like *C. gorgonensis* are predated by phyllostomid bats<sup>65</sup>.  
379 Here we argue that the pinnal structures of the external tympanal ports of katydid ears act as  
380 sound guides providing acute ultrasonic hearing allowing the detection of echolocation calls of  
381 hunting bats and thus an additional sensory based defence in the predatory-prey arms race. The  
382 presented numerical and experimental evidence suggests that the greatest ultrasonic gain of the  
383 pinnae is at frequencies matching those falling into the frequency range of the echolocation  
384 calls of native bat species (Fig. 5). As neotropical bats approach their target, they emit short,



385 broadband, multi-harmonic sweeps, demodulate the frequency from higher frequencies above  
386 135 kHz to as low 35 kHz<sup>78,80</sup>. In terms of predator detection, a katydid like *C. gorgonensis*  
387 has an excellent chance of detecting the calls of a hunting bat even at the start of the sweep.  
388 Responses to these high frequencies are supported by LDV recordings of tympanal motion in  
389 intact ears of free-field specimens, and behavioural audiograms that show a broad mechanical  
390 and behavioural response to ultrasounds responses (Supplementary Table S3, Fig. 5a and 5b).  
391 These broad responses to ultrasound are common in Tettigoniidae<sup>81,82</sup>, as shown in the katydid  
392 *Neoconocephalus ensiger*, a copiphorine with ear pinnae and EC<sup>51</sup>. A gain of 16 – 20 dB at the  
393 start of the bat call provides essential awareness time ( $\leq 0.86$  ms in terms of duration of the  
394 complete sweep<sup>78</sup>) to *C. gorgonensis* as a result of the tympanal pinnae. Other katydid species  
395 living in sympatry with *C. gorgonensis* like *Supersonus aequoreus* and *Eubliastes aethiops*  
396 exhibit similar cavity induced pressure gains in the range of phyllostomid bats (Supplementary  
397 Fig. S4).

398 The pressure – time difference receiver of *C. gorgonensis* is a unique system that can capture  
399 different ranges of frequencies between the multiple entry ports that can atone the limitations  
400 of each but is also capable of compensating for limitations in auditory orientation<sup>14</sup>. For  
401 katydids, incident sounds from elevation are difficult to perceive<sup>33</sup>. The ability of the external  
402 port to be positioned and rotated in accordance with the movement of the foretibial knee and  
403 foretibial leg joints permits for the ear to be more vertically oriented. The  $\mu$ -CT imaging  
404 presented here of the tympanal cavities supports the theory for vertical orientation as the sub-  
405 slit cavity is asymmetrically recessed to the distal end, which is likely to enhance mechanical  
406 responses to vertical stimuli (Fig. 1d). For ultrasonic reception, a total of four asymmetrical  
407 external ports (left and right ATMs and PTMs) may be behaviourally articulated in a manner  
408 to enhance the detection of elevated bat calls, and the physical separation between the external  
409 ports of each ear yield sufficient binaural cues.

410

411 ***Katydid ear pinnae and the fossil record***

412 The presence of ear pinnae in katydids is unknown in the fossil record. Katydid ancestors (e.g.,  
413 Haglidae and Prophalangopsidae from upper Jurassic<sup>83</sup>) and early katydids from the middle  
414 Paleogene (Eocene, ~55 mya<sup>84,85</sup>) all show naked tympana (without pinnae). The earliest  
415 echolocating bats are from the Eocene<sup>86</sup>, therefore katydids with tympanal pinnae on their ears  
416 may have initially evolved such sophisticated hearing devices to survive nocturnal predators  
417 while they sing under the cover of darkness. Although katydid ear pinnae have never been  
418 mapped in the most recent molecular phylogenies<sup>87,88</sup>, we observe a potential unique origin of  
419 ear pinnae in the family Tettigoniidae, with multiple losses in modern species, including the  
420 large Phaneropterinae (predominantly known to have naked tympana). Comparative analyses  
421 using large phylogenies are needed to solve this working hypothesis. Analogous ear pinnae  
422 adaptations are observed in some Eneopterinae crickets (Tribe Lebinthini)<sup>89</sup>, which differ from  
423 field crickets in their use of high frequencies for specific communication (12-28 kHz). These  
424 crickets emerged also in the Eocene<sup>90</sup> and while their ancestors exhibit only one functional  
425 tympanum (PTM) the extant forms show two functional asymmetric tympana, with the ATM  
426 covered by pinnae<sup>89</sup>. Such adaptation suggests a new paradigm of the dual role of the ears, in  
427 detecting conspecific calls and bat echolocation.

428 Several katydid species (e.g., Phaneropterinae, Mecopodidae) exhibit naked tympana  
429 (Supplementary Fig. S1b). While little is known about the ecology of many species, katydids  
430 have developed diverse hearing structure morphologies to respond to predation pressure<sup>91</sup>. Ears  
431 evolve very rapidly<sup>4,91</sup> and it would not be surprising that, without pinnal structures, some  
432 nocturnal Phaneropterinae evolved sophisticated ECs with exceptional broadband response  
433 (i.e., broader than that of *C. gorgonensis*)<sup>16,18,41</sup>. A study from Barro Colorado Island reported

434 31 Phaneropterinae katydids from Barro Colorado Island, of which about 42% use calling  
435 songs in the low ultrasonic range while 74% showing a spectral bandwidth of  $> 10$  kHz<sup>92</sup>. It  
436 might also be possible that some Phaneropterinae have a unique ear function via the EC which  
437 is capable of detecting conspecific calls as well as bats. This configuration of a single ear  
438 function is also potentially exhibited by *Supersonus aequoreous* (Supplementary Fig. S3)  
439 which show atrophied EC, and rest of the outer ear components (tympana and pinnae)  
440 specialised in identifying the direction of their own calls while at the same time detecting bats.  
441 Other adaptations of katydids without tympanal pinnae might involve activity during the  
442 daytime<sup>81,82</sup>, or dwell in dense vegetation that challenges flying<sup>93</sup>. For example, *Phlugis* and  
443 *Speculophlugis* species are diurnal visual predators that need day light to hunt<sup>94</sup>. Owing to their  
444 transparent camouflage, males are able to sing below Araceae leaves during the day and avoid  
445 visual detection by diurnal avian predators. Other katydids like *Conocephalus* sp. with  
446 tympanal pinnae are also active during the day time, although a few species are nocturnal or  
447 crepuscular, but a majority dwell in dense grass vegetation. Their calling songs are of unusual  
448 broadband energy (in many species expanding above 60 kHz<sup>95</sup>) and all *Conocephalus* sp. In  
449 this case, the retention of the pinnal condition might be associated with specific directional  
450 hearing like acoustic ranging<sup>96</sup> in such dense grass environments<sup>41,97</sup>.

451 While the diversity of form and function of pinnae in katydids requires a deeper comparative  
452 analysis, the presented findings suggest that in the assessed species, pinnae act as ultrasonic  
453 resonators for the early detection of echolocating bats. As a working hypothesis, we propose  
454 that the ear pinnae have a unique origin across the ca. 8000 species of Tettigoniidae<sup>9</sup> in response  
455 to the emergence of bats during the early Eocene, and that it was subsequently lost several  
456 times.

457

## 458 **Materials and methods**

### 459 *Specimens*

460 *Copiphora gorgonensis* (Tettigoniidae: Copiphorini) is endemic to Gorgona National Natural  
461 Park, Colombia (02°58'03"N 78°10'49"W). The original generation of the species were  
462 imported to the UK under the research permit granted by the Colombian Authority (DTS0-G-  
463 090 14/08/2014) in 2015. The specimens were ninth generation, captive bred colonies and  
464 maintained at 25°C, 70% RH, light: day 11 h: 23 h. They were fed *ad libitum* diet of bee pollen  
465 (Sevenhills, Wakefield, UK), fresh apple, dog food (Pedigree Schmackos, UK) and had access  
466 to water. Live experiments were conducted on seven adults of *C. gorgonensis* from our  
467 laboratory breeding colonies at the University of Lincoln (Lincoln, UK). Following  
468 experimentation, these specimens plus an additional four females already stored in ethanol  
469 were micro-CT scanned for finite element modelling; totalling 17 ears (10 female, 7 male).  
470 Live specimens were preserved in ethanol-filled jars and stored in a freezer at – 22°C at the  
471 University of Lincoln (Lincoln, UK).

472

### 473 *Simultaneous recordings of tympanal vibrations using laser Doppler Vibrometry*

474 Insects were chemically anesthetized using triethylamine-based agent FlyNap (Carolina  
475 Biological Supply, USA) for 15 min prior to the mounting process, and remained awake  
476 throughout the duration of the experiment. The animals were dorsally mounted using a  
477 specialized platform to isolate the external and internal sound inputs and also mimic their  
478 natural stance. A rosin-beeswax mix was used to fix the pronotum, and the mid and hind legs,  
479 to the mount. This specialized platform<sup>13</sup> consists of a two Perspex panels (1.61 mm diameter)  
480 that are joined by latex and suspended in the air by a 12 x 12 mm metal frame attached to a  
481 micromanipulator (World Precision Instruments, Inc., USA) (see<sup>35</sup>). At the Perspex junction,

482 the forelegs of the insect were extended through arm holes cut in the Perspex and attached on  
483 a rubber block with metal clasps. A metal clasp was placed on each foretibia and forefemur  
484 (total of 4) to arrest foreleg motion. The arm holes and frame borders were sealed with latex to  
485 deny sound propagation to the spiracle.

486 The LDV system consisted of a the OFV-2520 Dual Channel Vibrometer - range velocity  
487 controller for operating two single point laser sensor heads, sensor heads hereafter (OFV-534,  
488 Polytec, Germany) each with VIB-A-534 CAP camera video feed and laser filters. Each sensor  
489 head was mounted on a two-axis pivoting stage (XYZ, Thorlabs Inc., USA) anchored to an  
490 articulating platform (AP180, Thorlabs Inc., USA) and manually focused at 10.5 cm above a  
491 vibration isolation table (Pneumatic Vibration Isolation Table with a B120150B - Nexus  
492 Breadboard, 1200 mm x 1500 mm x 110 mm, M6 x 1.0 Mounting Holes, Thorlabs Inc., USA)  
493 supported by an anti-vibration frame (PFA52507 - 800 mm Active Isolation Frame 900 mm x  
494 1200 mm, Thorlabs Inc., USA) in an anechoically isolated chamber (AC Acoustics, Series  
495 120a, internal dimensions of 2.8 m x 2.7 m x 2.71 m). The sensor heads were outfitted with  
496 magnification microscopic lenses (Mitutoyo M Plan 10x objective for Polytec PSV-500 single  
497 laser head OFV 534, Japan) and positioned about 35 to 40 mm away from the insect foreleg at  
498 45° angles towards the Perspex surface (Supplementary Fig. S5). The narrow entrance to the  
499 tympanal cavities restricted the use of LDV to measure tympanal responses across the entire  
500 tympanal membrane. Therefore, the placement of the sensor heads was limited to positions  
501 where the sensor heads were perpendicular to the tympanic membrane of interest. The sensor  
502 speeds were maintained at 0.005 (m/s)/V and recorded using an OFV-2520 internal data  
503 acquisition board (PCI-4451; National Instruments, USA).

504 Tympanal vibrations were induced by a four-cycle sinusoidal wave at 23, 40 and 60 kHz. The  
505 closed-field configuration of the loudspeaker restricts the delivery of high ultrasonic stimuli to  
506 60 kHz. A rotating automated stage (PRM1Z8 rotation mount, Thorlabs Inc., USA) with a

507 KDC101 K-Cube™ DC Servo Motor Controller (Thorlabs Inc., USA) positioned a multi-field  
508 magnetic loudspeaker (MF1, Tucker Davis, USA) with a parabolic nozzle (see Supplementary  
509 Materials from<sup>14</sup>) and plastic probe tip (3.5 cm L x internal diameter 1.8 mm W) about 3.5 mm  
510 away from the mounted insect and 10.2cm above the breadboard table. The speaker was moved  
511 across a 12 cm semi-circle in 1° steps (0.56 mm). The probe tip was positioned at “point zero”  
512 and 20 single shot recordings at 1°, totalling 10° at either side of this port (Supplementary Fig.  
513 S6). A high quality 500 band pass filter was applied at 10 to 30 kHz for the 23 kHz recordings,  
514 30 to 50 kHz for the 40 kHz recordings, and 50 to 70 kHz for the 60 kHz recordings. All  
515 acoustic signals were generated by a waveform generator (SDG 1020, Siglent, China),  
516 synchronized with the LDV, amplified (ZB1PS, Tucker Davis, USA) and measured by a 1/8”  
517 (3.2 mm) omnidirectional microphone (Type 4138, Brüel & Kjaer, Nærum Denmark) located  
518 about 3 mm from tympanum. The microphone, with built in preamplifier (B&K 2670, Brüel &  
519 Kjær, Nærum, Denmark), was calibrated using a sound-level calibrator (Type 4237, Brüel &  
520 Kjær, Nærum, Denmark) and set to 316 mV/Pa output via a conditioning amplifier (Nexus  
521 2690-OS1, Brüel & Kjær, Nærum, Denmark). A reference measurement was performed by  
522 placing the microphone 3 mm from the probe tip to the loudspeaker before each experiment.  
523 Using a micro-manipulator, the microphone was positioned approximately 3 to 3.5 mm from  
524 the ear to monitor the acoustic isolation of the platform.

525

### 526 *Experimental procedures*

527 The sensor heads were manually focused on the external tympanal surface using the 2-axis  
528 pivoting stage and manual wheel with the aid of the sensor head camera output displayed on  
529 an LED screen. For the time measurements, the point zero was found for each leg and for each  
530 test frequency. The point zero was the point where the displacements from the anterior

531 tympanic membrane (ATM) and posterior tympanic membrane (PTM) matched the oscillation  
532 phase of the generated 4-cycle sinusoidal waves. This ensured that the vibrations of the  
533 tympanic membranes were synchronous relative to the speaker position. Displacement  
534 amplitudes from the same cycle order number were measured from each sensor head reference,  
535 and approximately 252 data points were measured per ear.

536 After recording the vibrations for both insect ears, the cuticular pinnae were carefully excised  
537 (not to damage the tympanal organs or the fine layer of tissue ventrally connected to the  
538 tympanic membranes) using a razor blade. The measurements were repeated for each ear  
539 following the same protocol.

540 Time and displacement measurements were analysed by identifying the second oscillation of  
541 the 4-cycle tone generated waves in each PSV software window (PSV 9.4 Presentation  
542 software, Polytec, Germany).

543

#### 544 ***Morphological studies of the ear***

545 To produce 3D data for modelling, 17 ears of *C. gorgonensis* were scanned using a SkyScan  
546 1172 X-ray micro-CT scanner (Bruker Corporation, Billerica, MA, USA) with a resolution  
547 between 1.3 and 2.9  $\mu\text{m}$  (55 kV source voltage, 180  $\mu\text{A}$  source current, 300 ms exposure and  
548 0.1° rotation steps). As experimental procedures required removal of the cuticular pinnae, eight  
549 additional specimens with intact pinnae were scanned. The micro-CT projection images were  
550 reconstructed with NRecon (v.1.6.9.18, Bruker Corporation, Billerica, MA, USA) to produce  
551 a series of orthogonal slices. The 3D segmentation of the ear, measurements of the ear cross  
552 section and width, and volumetric measurements of the cavities formed by the pinnae were  
553 performed with the software Amira-Aviso 6.7 (Thermo Fisher Scientific, Waltham,

554 Massachusetts, USA). Micro-CT stereolithography files (STL) were generated for numerical  
555 modelling using established protocols<sup>13,14</sup> and to 3D print ear models.

556 For 2D measurements of the cavity slit area, pinnal protrusion, and the distance between the  
557 pinnal cavities, an Alicona InfiniteFocus microscope (G5, Bruker Alicona Imaging, Graz,  
558 Austria) at x5 objective magnification was used to capture images with a resolution of about 100  
559 nm of collection specimens with pinnae intact ( $n = 8$  ears).

560

### 561 ***Bat and insect call recordings***

562 The echolocation calls of phyllostomid bats (Chiroptera: Phyllostomidae) native to Gorgona  
563 Island were recorded in 2015. The call of *Micronycteris megalotis* was recorded using the Echo  
564 Meter Touch 2 (Wildlife Acoustics, Maynard, MA, USA), with a sampling rate of 384 kHz.  
565 *Gardnerycteris crenulatum*, *Tonatia saurophila* and *Micronycteris microtis* were recorded in  
566 a small indoor flight cage (1.4 x 1.0 x 0.8 m) in which they were allowed to fly via an ultrasound  
567 condenser microphone (2-200 kHz frequency range,  $\pm 3$  dB frequency response between 25-  
568 140 kHz; CM16, CMPA preamplifier unit, Avisoft Bioacoustics, Glienicke, Germany) and real  
569 time ultrasound acquisition board (6 dB gain, 500 kHz sampling rate, 16 bit resolution;  
570 UltraSoundGate 116Hm, Avisoft Bioacoustics, Glienicke, Germany) connected to a laptop  
571 (Think Pad X220, Lenovo, Beijing, China), with a corresponding recording software (Avisoft  
572 RECORDER USGH, Avisoft Bioacoustics, Glienicke, Germany). These are the most common  
573 insectivorous gleaning species in the habitat of *C. gorgonensis*. Call description of single calls  
574 is presented as Supplementary Fig. S7.

575 *SI Appendix*, Section 1 (see Supplementary Fig. S8) has details of male *C. gorgonensis* calling  
576 song recording.

577



578 *Acoustics measurements of synthetic 3D-printed scaled ear models*

579 For time domain measurements, 3D models of the ears were placed on a micromanipulator arm  
580 with blu-tac (Bostik Ltd, Stafford, UK) and positioned frontally 30 cm from a MF1 loudspeaker  
581 at the same elevation. A 25 mm tipped B&K Type 4182 probe microphone (Brüel & Kjær,  
582 Nærum, Denmark) with a  $1 \times 25$  mm (0.99") probe tube length and 1.24 mm (0.05") interior  
583 diameter, calibrated using a B&K Type 4237 sound pressure calibrator was placed ventral to  
584 the ear. The ear moved onto the microphone using an electronic micromanipulator (TR10/MP-  
585 245, Sutter Instrument, Novato, California, USA), to a position 1 cm from the back of the  
586 cavity. Stimuli delivered were individually scaled to match the wavelength of a real-size ear  
587 (e.g., for a 1:10 scale printed model, the frequency delivered to simulate 120 kHz would be  
588  $120/10 = 12$  kHz) to account for variation in printed model scaling. 3D printed models were  
589 scaled 1:11.43 (male 1:11.33; female 1:11.53) with the corresponding average scaled stimuli  
590 of 2.01 kHz for 23 kHz, 3.50 kHz for 40 kHz, 5.25 kHz for 60 kHz, and 9.63 kHz for 110 kHz.  
591 Four cycle pure tones were produced using the aforementioned function generator, and the  
592 amplitude set to deliver 1 Pa to the microphone at each frequency. Received signals were  
593 amplified using a B&K 1708 conditioning amplifier (Brüel & Kjær, Nærum, Denmark), and  
594 acquired using a PSV-500 internal data acquisition board at a sampling frequency of 512 kHz.  
595 The microphone remained stationary during the experiments, nor was its direct path to the  
596 speaker obstructed. Instead, the microphone entered the ear via the drilled hole, allowing the  
597 pinnae to surround the tip of the microphone. Thus, the reported sound pressure gains result  
598 solely from the cavities of the 3D model, and not the motion of the microphone. When the  
599 microphone was positioned inside the cavities, the gap between the drilled hole and  
600 microphone probe was sealed with blu-tac (Bostik Ltd, Stafford, UK) to mimic the real cavity  
601 and avoid acoustic leaking (refer to Supplementary Materials Section 2: Video 1).

602 To calculate the frequency that produced the best gain, the MF1 loudspeaker was replaced with  
603 a RAAL 140-15D Flatfoil loudspeaker (RAAL, Serbia), with a different amplifier (A-400,  
604 Pioneer, Kawasaki, Japan). This speaker was able to deliver a broadband stimulus of periodic  
605 chirps, generated within Polytec 9.4 software, with a simulated frequency range of 2-150 kHz.  
606 Recording in the frequency domain, at a sampling frequency of 512 kHz, the amplitude of the  
607 broadband stimulus was mathematically corrected within the software to deliver 60 dB at all  
608 frequencies. The reference frequency spectrum with no ear present could be subtracted from  
609 the frequency spectrum reported within the cavities to calculate frequency-specific gain and  
610 thus cavity resonance. Gain was calculated by subtracting the probe microphone sound pressure  
611 (dB) measured 1 cm outside of the cavity from inside the tympanal cavity measurements (Fig.  
612 3b and 3c; see also Supplementary Materials Section 2: Video 1).

613 For comparative purposes, the ears of the following sympatric and pinnae bearing katydid  
614 species from Gorgona Island were also 3D printed and subjected to experiments according to  
615 the aforementioned protocol: *Supersonus aequoreus*, *Eubliastes aethiops*, and *Pleminiini* sp.  
616 (see Supplementary Fig. S3).

617 Frequency domain recordings of the cavity resonance, and time domain recordings of pure tone  
618 gains were then exported as .txt files for analysis. Methods for printing 3D ear models are  
619 provided in the Supplementary Materials Section 1.

620

### 621 ***Mathematical models and numerical simulations***

622 The mathematical models have been constructed as a scattering acoustic – structure interaction  
623 problem and simulate the acoustic response of the tympanal cavities to an incident plane  
624 acoustic wave in an air domain. Hence, the 3D model considers the interaction of the sound  
625 wave with the ear, for which realistic material properties have been incorporated. The air

626 acoustic domain is truncated as a sphere with a 3 mm radius that is centered around the ear  
627 (Supplementary Fig. S9). Two different geometries of the ears were taken as part of the  
628 mathematical model domain: pinnae intact and pinnae removed (Supplementary Fig. S10).

629 The models were considered both in the frequency and the time domains, and were solved  
630 using the acoustic-shell interaction module of the software Comsol Multiphysics, v5.6<sup>98</sup>. For  
631 the frequency domain models, the incident wave was taken to be a chirp with an amplitude of  
632 1 Pa and frequency 2-150 kHz, directed at “point zero” as defined in the in the section  
633 *vibrational measurements*. For the time domain models, three different incident waves were  
634 used, with amplitudes 1 Pa and frequencies 23, 40, 60 kHz. The direction of the waves was  
635 taken as  $-10^\circ$ ,  $-5^\circ$ ,  $0^\circ$ ,  $5^\circ$  and  $10^\circ$  on a fixed plane perpendicular to the ear, with  $0^\circ$   
636 corresponding to “point zero”. The details of the solved system of equations can be found in  
637 Supplementary Materials Section 1.

638 The numerical solution to the problem was obtained using the finite element method for the  
639 spatial variables in both the time and frequency domain simulations. For forming the finite-  
640 element mesh, the maximum diameter used for the tetrahedral elements in the sphere was  
641  $h_{max} = \frac{c}{6 \times f_0}$ , where  $c = 343$  m/s and  $f_0 = 150$  kHz (Supplementary Fig. S11 and S12).  
642 Hence, even at the largest frequency considered, there were six tetrahedral elements per  
643 wavelength. Quadratic Lagrange elements were applied for the solution.

644 For the time domain solution, the time variable was solved for using the Generalized alpha  
645 method, with a constant time step of  $\Delta t = \frac{1}{60 \times 150}$  s, so that the Courant-Friedrichs-Lewy (CFL)  
646 condition<sup>99</sup>, defined as  $CFL = \frac{c \times h_{max}}{\Delta t}$  was 0.1, which gives a reliable approximation of the  
647 solution.

648

649 ***Behavioral and tympanal response to broadband stimulation***

650 Behavioral audiograms: Behavioral audiograms were performed on nine tethered female ( $n =$   
651 9) *C. gorgonensis* to test behavioral response thresholds to controlled auditory stimuli (20 –  
652 120 kHz). Methods are provided in Supplementary Materials Section 1.

653 Tympanal tuning: We exposed seven (4 males, 3 females) specimens to free field broadband  
654 (periodic chirp 20 – 120 kHz) stimulation presented by an ipsilaterally positioned SS-  
655 TW100ED Super-Tweeter (Sony, Tokyo, Japan) with a 20 kHz built-in high-pass filter using  
656 an Avisoft Bioacoustics Ultrasonics Power Amplifier (Avisoft Bioacoustics,  
657 Glienicke/Nordbahn, Germany). A rosin-beeswax mix was used to fix the pronotum, and the  
658 mid and hind legs, to the mount (see<sup>35</sup>) after the insects were chemically anesthetized using  
659 FlyNap. Insects were then elevated to the same level as the LDV vibrometer and positioned  
660 15 cm from the loudspeaker. A B&K Type 4138 microphone was placed about 3 mm in front  
661 of the ear of interest and recorded the stimulus. Mechanical responses were acquired using a  
662 PSV-500 internal data acquisition board at a sampling frequency of 512 kHz. The amplitude  
663 was corrected to maintain 60 dB SPL at all frequencies. Data was collected as magnitude  
664 (velocity / sound pressure).

665

666 ***Statistical analyses***

667 Using empirical data we tested the effect of cuticular pinnae on tympanal responses (in  
668 displacement amplitude (natural log transformed) and arrival time) to incident sound, we fitted  
669 linear mixed models (LMM) with angle ( $-10^\circ$  to  $10^\circ$ , polynomial continuous variable) as a  
670 covariate and presence of pinnae (y/n), frequency (23, 40 and 60 kHz, categorical variable),  
671 tympanum (ATM or PTM) as fixed factors. We include the interactions between angle and  
672 pinnae and between pinnae and frequency. To model the curvature in the response surface of

673 the pinnal enclosed tympanum, angle was fitted as a quadratic polynomial with  $0^\circ$  (at point  
674 zero). The interaction of angle and pinnae was fitted as such to show the restriction of pinnal  
675 structures in both time and displacement to the response surface. We carried out post hoc tests  
676 between pinnae (y/n) at each frequency using estimated marginal means from the package  
677 `emmean`<sup>100</sup>.

678 To determine differences in both the anatomy and estimated resonance of the anterior and  
679 posterior pinnae, we carried out two-sample *t*-test and Wilcoxon rank sum (or Mann-Whitney  
680 U test) depending on data distribution. These anatomical differences included the area of the  
681 entrance to the cavity, cavity volume, and protrusion.

682 Using the same initial LMM model, we tested how sound pressure estimated from numerical  
683 models was related to angle ( $-10^\circ$  to  $10^\circ$ , polynomial continuous variable), presence of pinnae  
684 (y/n), frequency (23, 40 and 60 kHz, categorical variable), tympanum (ATM or PTM) as fixed  
685 factors. Again, we include the interactions between angle and pinnae and between pinnae and  
686 frequency. We finally tested sound pressure based on 3D models. the presence of pinnae (y/n),  
687 frequency (23, 40 and 60 kHz, categorical variable), tympanum (ATM or PTM) as fixed  
688 factors, with the inclusion of the interaction between pinnae and frequency. For both numerical  
689 and 3D models, we carried out post hoc tests between pinnae (y/n) at each frequency using  
690 estimated marginal means from the package `emmeans`.

691 All LMMs were run using the package `lmerTest`<sup>101</sup> in R 4.0.0<sup>102</sup>. Statistical tests and graphs  
692 were performed on R 4.0.0<sup>102</sup>.

693

694 ***Data availability***

695 Experimental data (LDV recordings), numerical simulations, Comsol model files, and  $\mu$ -CT  
696 stereolithography files (in .stl format) are available in Dryad  
697 (<https://doi.org/10.5061/dryad.k0p2ngf8x>).

698

## 699 **Acknowledgements**

700 We thank the Orthopterists' Society for aiding in funding the micro-CT work of CW, for which  
701 some data has been used in this study, and to the University of Lincoln's School of Life  
702 Sciences for CW's PhD studentship.

703

## 704 **Author contributions**

705 All authors were involved in writing and revision of the manuscript. CP and FM-Z performed  
706 acoustic experiments on live specimens. CP and CW designed and performed all 3D print  
707 model experiments. CP constructed the speaker mount, automated the controls in the arena,  
708 collected and analysed data. CS designed the statistical model and completed statistical  
709 analyses. EC developed and performed all numerical models and simulations. CW illustrated  
710 figures, conducted  $\mu$ -CT scans, performed all post-image segmentation for numerical analyses,  
711 and conducted 3D printing. IG and FM-Z recorded insect and bat acoustic signals. FM-Z and  
712 DC performed behavioural audiograms. FM-Z and CP conceived the idea for the project. FM-  
713 Z led the lab, assisted with idea development, and provided equipment training.

714

## 715 **Competing interests**

716 No competing interests declared

717

718 **Funding**

719 This research is part of the project "The Insect Cochlea" funded by the European Research  
720 Council, Grant ERCCoG-2017-773067 to FM-Z; and was also funded by the Natural  
721 Environment Research Council (NERC), grant DEB-1937815 to FM-Z.

722 **References**

- 723 1. Göpfert, M. C. & Hennig, R. M. Hearing in Insects. *Annu. Rev. Entomol.* **61**, 257–276  
724 (2016).
- 725 2. Robert, D. Directional Hearing in Insects. in *Sound Source Localization* (eds. Popper,  
726 A. N. & Fay, R. R.) 6–35 (Springer New York, 2005). doi:10.1007/0-387-28863-5\_2.
- 727 3. Warren, B. & Nowotny, M. Bridging the Gap Between Mammal and Insect Ears – A  
728 Comparative and Evolutionary View of Sound-Reception . *Frontiers in Ecology and*  
729 *Evolution* vol. 9 504 (2021).
- 730 4. Song, H. *et al.* Phylogenomic analysis sheds light on the evolutionary pathways  
731 towards acoustic communication in Orthoptera. *Nat. Commun.* **11**, 4939 (2020).
- 732 5. Strauß, J. & Stumpner, A. Selective forces on origin, adaptation and reduction of  
733 tympanal ears in insects. *J. Comp. Physiol. A* **201**, 155–169 (2015).
- 734 6. Lakes-Harlan, R. & Scherberich, J. Position-dependent hearing in three species of  
735 bushcrickets (Tettigoniidae, Orthoptera). *R. Soc. Open Sci.* **2**, 140473 (2015).
- 736 7. Suga, N. Principles of auditory information-processing derived from neuroethology. *J.*  
737 *Exp. Biol.* **146**, 277–286 (1989).
- 738 8. Hartbauer, M. & Römer, H. From microseconds to seconds and minutes-time

- 739 computation in insect hearing. *Front. Physiol.* **5 APR**, 1–12 (2014).
- 740 9. Cigliano, M. M., Braun, H., Eades, D. C. & Otte, D. Orthoptera Species file v.5.0.  
741 *Orthoptera Species File* <http://orthoptera.speciesfile.org> (2021).
- 742 10. Bailey, W. J. The ear of the bushcricket. in *The Tettigoniidae. Biology, systematics and*  
743 *evolution* (eds. Bailey, W. J. & Rentz, D.) 217–247 (Crawford House Press, 1990).
- 744 11. Strauß, J., Lehmann, A. W. & Lehmann, G. U. C. Sensory evolution of hearing in  
745 tettigoniids with differing communication systems. *J. Evol. Biol.* **27**, 200–213 (2014).
- 746 12. Kalmring, K. *et al.* The Auditory-Vibratory Sensory System in Bushcrickets  
747 (Tettigoniidae, Ensifera, Orthoptera) I Comparison of Morphology, Development and  
748 Physiology. in *Environmental Signal Processing and Adaptation* (eds. Heldmaier, G.  
749 & Werner, D.) 169–207 (Springer Berlin Heidelberg, 2003). doi:10.1007/978-3-642-  
750 56096-5\_9.
- 751 13. Jonsson, T., Montealegre-Z, F., Soulsbury, C. D., Robson Brown, K. A. & Robert, D.  
752 Auditory mechanics in a bush-cricket: direct evidence of dual sound inputs in the  
753 pressure difference receiver. *J. R. Soc. Interface* **13**, 20160560 (2016).
- 754 14. Veitch, D. *et al.* A narrow ear canal reduces sound velocity to create additional  
755 acoustic inputs in a microscale insect ear. *Proc. Natl. Acad. Sci. U. S. A.* **118**, (2021).
- 756 15. Lewis, B. the Physiology of the Tettigoniid Ear. *Methods* 861–869 (1974).
- 757 16. Michelsen, A. & Larsen, O. N. Biophysics of the ensiferan ear - I. Tympanal vibrations  
758 in bushcrickets (Tettigoniidae) studied with laser vibrometry. *J. Comp. Physiol. A* **123**,  
759 193–203 (1978).
- 760 17. Nocke, H. Physical and physiological properties of the tettigoniid (‘grasshopper’) ear.  
761 *J. Comp. Physiol. A* **100**, 25–57 (1975).



- 762 18. Hoffmann, E. & Jatho, M. The acoustic trachea of Tettigoniids as an exponential horn:  
763 Theoretical calculations and bioacoustical measurements. *J. Acoust. Soc. Am.* **98**,  
764 1845–1851 (1995).
- 765 19. Larsen, O. N. Mechanical time resolution in some insect ears - II. Impulse sound  
766 transmission in acoustic tracheal tubes. *J. Comp. Physiol. A* **143**, 297–304 (1981).
- 767 20. Michelsen, A., Rohrseitz, K., Heller, K. G. & Stumpner, A. A new biophysical method  
768 to determine the gain of the acoustic trachea in bushcrickets. *J. Comp. Physiol. A* **175**,  
769 145–151 (1994).
- 770 21. Michelsen, A. & Larsen, O. N. Pressure difference receiving ears. *Bioinspiration and*  
771 *Biomimetics* **3**, 011001 (2008).
- 772 22. Autrum, H. Über Lautäusserungen und Schallwahrnehmung bei Arthropoden II. Z.  
773 *Vgl. Physiol.* **28**, 326–352 (1940).
- 774 23. Autrum, H. Anatomy and physiology of sound receptors in invertebrates. *Acoust.*  
775 *Behav. Anim.* 412–433 (1963).
- 776 24. Bailey, W. J. & Stephen, R. O. Directionality and auditory slit function: A theory of  
777 hearing in bushcrickets. *Science (80-. )*. **201**, 633–634 (1978).
- 778 25. Stephen, R. O. & Bailey, W. J. Bioacoustics of the ear of the bushcricket *Hemisaga*  
779 (*Sagenae*). *J. Acoust. Soc. Am.* **72**, 13–25 (1982).
- 780 26. Mason, A. C., Morris, G. K. & Wall, P. High ultrasonic hearing and tympanal slit  
781 function in rainforest katydids. *Naturwissenschaften* **78**, 365–367 (1991).
- 782 27. Shen, J. A peripheral mechanism for auditory directionality in the bushcricket  
783 *Gampsocleis gratiosa*: Acoustic tracheal system. *J. Acoust. Soc. Am.* **94**, 1211–1217  
784 (1993).

- 785 28. Michelsen, A. & Nocke, H. Biophysical Aspects of Sound Communication in Insects.  
786 *Adv. In Insect Phys.* **10**, 247–296 (1974).
- 787 29. Eisner, N. & Popov, A. V. Neuroethology of Acoustic Communication. in vol. 3683  
788 229–355 (1978).
- 789 30. Hill, K. G. & Oldfield, B. P. Auditory function in tettigoniidae (Orthoptera:Ensifera).  
790 *J. Comp. Physiol. A* **142**, 169–180 (1981).
- 791 31. Yack, J. E. The structure and function of auditory chordotonal organs in insects.  
792 *Microsc. Res. Tech.* **63**, 315–337 (2004).
- 793 32. Montealegre-Z, F. & Robert, D. Biomechanics of hearing in katydids. *J. Comp.*  
794 *Physiol. A Neuroethol. Sensory, Neural, Behav. Physiol.* **201**, 5–18 (2015).
- 795 33. Römer, H. Directional hearing in insects: biophysical, physiological and ecological  
796 challenges. *J. Exp. Biol.* **223**, Pt 14 (2020).
- 797 34. Montealegre-Z, F. & Postles, M. Resonant sound production in *Copiphora gorgonensis*  
798 (*Tettigoniidae*: *Copiphorini*), an endemic species from Parque Nacional Natural  
799 Gorgona, Colombia. *J. Orthoptera Res.* **19**, 347–355 (2010).
- 800 35. Montealegre-Z, F., Jonsson, T., Robson Brown, K. A., Postles, M. & Robert, D.  
801 Convergent evolution between insect and mammalian audition. *Science (80-. )*. **338**,  
802 968–97 (2012).
- 803 36. Rossing, T. D. & Fletcher, N. H. *Principles of Vibration and Sound*. (Springer New  
804 York, 2004). doi:10.1007/978-1-4757-3822-3.
- 805 37. Celiker, E., Jonsson, T. & Montealegre-Z, F. On the tympanic membrane impedance  
806 of the katydid *Copiphora gorgonensis* (Insecta: Orthoptera: Tettigoniidae) . *J. Acoust.*  
807 *Soc. Am.* **148**, 1952–1960 (2020).

- 808 38. Hummel, J., Wolf, K., Kössl, M. & Nowotny, M. Processing of simple and complex  
809 acoustic signals in a tonotopically organized ear. *Proc. R. Soc. B Biol. Sci.* **281**,  
810 20141872 (2014).
- 811 39. Windmill, J. F. C., Fullard, J. H. & Robert, D. Mechanics of a 'simple' ear: tympanal  
812 vibrations in noctuid moths. *J. Exp. Biol.* **210**, 2637–2648 (2007).
- 813 40. Bialek, W. Physical limits to sensation and perception. *Annu. Rev. Biophys. Biophys.*  
814 *Chem.* **16**, 455–478 (1987).
- 815 41. Rheinlaender, J. & Römer, H. Insect hearing in the field. *J. Comp. Physiol. A* **158**,  
816 647–651 (1986).
- 817 42. Windmill, J. F. C., Jackson, J. C., Tuck, E. J. & Robert, D. Keeping up with bats:  
818 dynamic auditory tuning in a moth. *Curr. Biol.* **16**, 2418–2423 (2006).
- 819 43. Fullard, J. H. External auditory structures in two species of neotropical notodontid  
820 moths. *J. Comp. Physiol. A* **155**, 625–632 (1984).
- 821 44. Heinrich, R., Jatho, M. & Kalmring, K. Acoustic transmission characteristics of the  
822 tympanal tracheae of bushcrickets (Tettigoniidae). II: Comparative studies of the  
823 tracheae of seven species. *J. Acoust. Soc. Am.* **93**, 3481–3489 (1993).
- 824 45. Bailey, W. J., Stephen, R. O. & Yeoh, P. Signal transmission in noisy environments:  
825 Auditory masking in the tympanic nerve of the bushcricket *Metaballus litus*  
826 (Orthoptera: Tettigoniinae). *J. Acoust. Soc. Am.* **83**, 1828–1832 (1988).
- 827 46. Celiker, E., Jonsson, T. & Montealegre-Z, F. The auditory mechanics of the outer ear  
828 of the bush cricket: a numerical approach. *Biophys. J.* **118**, 464–475 (2020).
- 829 47. Fullard, J. H. Acoustic relationships between tympanate moths and the Hawaiian hoary  
830 bat (*Lasiurus cinereus semotus*). *J. Comp. Physiol. A* **155**, 795–801 (1984).

- 831 48. Sarria-S, F. A., Chivers, B. D., Soulsbury, C. D. & Montealegre-Z, F. Non-invasive  
832 biophysical measurement of travelling waves in the insect inner ear. *R. Soc. Open Sci.*  
833 **4**, 1–11 (2017).
- 834 49. Bailey, W. J. The tettigoniid (Orthoptera : Tettigoniidae) ear: Multiple functions and  
835 structural diversity. *Int. J. Insect Morphol. Embryol.* **22**, 185–205 (1993).
- 836 50. Rajaraman, K. *et al.* Low-pass filters and differential tympanal tuning in a  
837 paleotropical bushcricket with an unusually low frequency call. *J. Exp. Biol.* **216**, 777–  
838 787 (2013).
- 839 51. Faure, P. A. & Hoy, R. R. The sounds of silence: cessation of singing and song  
840 pausing are ultrasound-induced acoustic startle behaviors in the katydid  
841 *Neoconocephalus ensiger* (Orthoptera; Tettigoniidae). *J. Comp. Physiol. A* **186**, 129–  
842 142 (2000).
- 843 52. Arlettaz, R., Ruedi, M. & Hausser, J. Ecologie trophique de deux espèces jumelles et  
844 sympatriques de chauves-souris: *Myotis myotis* et *Myotis blythii* (Chiroptera :  
845 Vespertilionidae). Premiers résultats: **57**, 519–532 (1993).
- 846 53. LaVal, R. K. & LaVal, M. L. Prey selection by the slit-faced bat *Nycteris thebaica*  
847 (Chiroptera: Nycteridae) in Natal, South Africa. *Biotropica* **12**, 241–246 (1980).
- 848 54. Davison, G. & Zubaid, A. Food habits of the Lesser false vampire, *Megaderma*  
849 *spasma*, from Kuala Lompat, Peninsular Malaysia. *Z. Säugetierkd.* **57**, 310–312  
850 (1992).
- 851 55. Fenton, M. B. & Museum., R. O. *Observations on the biology of some Rhodesian*  
852 *bats : including a key to the Chiroptera of Rhodesia.* (Royal Ontario Museum, 1975).
- 853 56. Whitaker, J. O. & Black, H. Food habits of cave bats from Zambia, Africa. *J. Mammal.*

- 854           **57**, 199–204 (1976).
- 855   57.   Raghuram, H., Deb, R., Nandi, D. & Balakrishnan, R. Silent katydid females are at  
856           higher risk of bat predation than acoustically signalling katydid males. *Proc. R. Soc. B*  
857           *Biol. Sci.* **282**, 20142319 (2015).
- 858   58.   Zhang, L. *et al.* Diet of Flat-Headed Bats, *Tylonycteris pachypus* and *T. robustula*, in  
859           Guangxi, South China. *J. Mammal.* **86**, 61–66 (2005).
- 860   59.   Buchler, E. R. & Childs, S. B. Orientation to distant sounds by foraging big brown bats  
861           (*Eptesicus fuscus*). *Anim. Behav.* **29**, 428–432 (1981).
- 862   60.   Murillo G, O. E., Bedoya, M. J., Velandia-Perilla, J. H. & Yusti-Muñoz, A. P. Riqueza  
863           de especies, nuevos registros y actualización del listado taxonómico de la comunidad  
864           de murciélagos del Parque Nacional Natural Gorgona, Colombia . *Revista de Biología*  
865           *Tropical* vol. 62 407–417 (2014).
- 866   61.   Belwood, J. J. & Morris, G. K. Bat predation and its influence on calling behavior in  
867           neotropical katydids. *Science (80- )*. **238**, 64–67 (1987).
- 868   62.   Belwood, J. J. Anti-Predator Defences and Ecology of Neotropical Forest Katydids,  
869           Especially the Pseudophyllinae. in *The Tettigoniidae. Biology, systematics and*  
870           *evolution* (eds. Bailey, W. J. & Rentz, D.) 8–26 (Springer-Verlag, 1990).
- 871   63.   Nickle, D. A. & Castner, J. L. Strategies utilized by katydids (Orthoptera:  
872           Tettigoniidae) against diurnal predators in rainforests of northeastern Peru. *J.*  
873           *Orthoptera Res.* **4**, 75 (1995).
- 874   64.   ter Hofstede, H., Kalko, E. K. V & Fullard, J. H. Auditory-based defence against  
875           gleaning bats in neotropical katydids (Orthoptera: Tettigoniidae). *J. Comp. Physiol. A.*  
876           *Neuroethol. Sens. Neural. Behav. Physiol.* **196**, 349–358 (2010).

- 877 65. ter Hofstede, H. *et al.* Revisiting adaptations of neotropical katydids (Orthoptera:  
878 Tettigoniidae) to gleaning bat predation. *Neotrop. Biodivers.* **3**, 41–49 (2017).
- 879 66. Montealegre-Z, F., Sarria, F. A., Pimienta, M. C. & Mason, A. C. Lack of correlation  
880 between vertical distribution and carrier frequency, and preference for open spaces in  
881 arboreal katydids that use extreme ultrasound, in Gorgona, Colombia (Orthoptera:  
882 Tettigoniidae). *Rev. Biol. Trop.* **62**, 289 (2014).
- 883 67. Wiley, R. H. & Richards, D. G. Physical constraints on acoustic communication in the  
884 atmosphere: Implications for the evolution of animal vocalizations. *Behav. Ecol.*  
885 *Sociobiol.* **3**, 69–94 (1978).
- 886 68. Römer, H. Environmental and biological constraints for the evolution of long-range  
887 signalling and hearing in acoustic insects. *Philos. Trans. R. Soc. London. Ser. B Biol.*  
888 *Sci.* **340**, 179–185 (1993).
- 889 69. Rentz, D. C. Two new katydids of the genus *Melanonotus* (*Melanonotus powellorum*)  
890 from Costa Rica with comments on their life history strategies (Tettigoniidae:  
891 Pseudophyllinae). *Entomol. News* (1975).
- 892 70. Morris, G. K. & Beier, M. Song Structure and Description of Some Costa Rican  
893 Katydid ( Orthoptera : Tettigoniidae ) Author ( s ): Glenn K . Morris and Max Beier  
894 Source : Transactions of the American Entomological Society ( 1890- ) , Mar . - Jun . ,  
895 1982 , Published by : American E. **108**, 287–314 (1982).
- 896 71. Morris, G. K., Mason, A. C., Wall, P. & Belwood, J. J. High ultrasonic and tremulation  
897 signals in neotropical katydids (Orthoptera: Tettigoniidae). *J. Zool.* **233**, 129–163  
898 (1994).
- 899 72. Heller, K. G. Acoustic signalling in palaeotropical bushcrickets (Orthoptera:

- 900 Tettigonioidea: Pseudophyllidae): does predation pressure by eavesdropping enemies  
901 differ in the Palaeo- and Neotropics? *J. Zool.* **237**, 469–485 (1995).
- 902 73. Robinson, D. J. & Hall, M. J. Sound signalling in orthoptera. *Adv. In Insect Phys.* **29**,  
903 151–278 (2002).
- 904 74. Geipel, I. *et al.* Bats actively use leaves as specular reflectors to detect acoustically  
905 camouflaged prey. *Curr. Biol.* **29**, 2731-2736.e3 (2019).
- 906 75. Geipel, I. *et al.* Predation risks of signalling and searching: Bats prefer moving  
907 katydids. *Biol. Lett.* **16**, 3–7 (2020).
- 908 76. Page, R. & Bernal, X. E. The challenge of detecting prey: Private and social  
909 information use in predatory bats. *Funct. Ecol.* **34**, 344–363 (2020).
- 910 77. Falk, J. J. *et al.* Sensory-based niche partitioning in a multiple predator-multiple prey  
911 community. *Proc. R. Soc. B Biol. Sci.* **282**, (2015).
- 912 78. Geipel, I., Lattenkamp, E. Z., Dixon, M. M., Wiegrebe, L. & Page, R. A. Hearing  
913 sensitivity: An underlying mechanism for niche differentiation in gleaning bats. *Proc.*  
914 *Natl. Acad. Sci. U. S. A.* **118**, (2021).
- 915 79. Geipel, I., Jung, K. & Kalko, E. K. V. Perception of silent and motionless prey on  
916 vegetation by echolocation in the gleaning bat *Micronycteris microtis*. *Proc. R. Soc. B*  
917 *Biol. Sci.* **280**, (2013).
- 918 80. Yoh, N., Syme, P., Rocha, R., Meyer, C. F. J. & López-Baucells, A. Echolocation of  
919 Central Amazonian ‘whispering’ phyllostomid bats: call design and interspecific  
920 variation. *Mammal Res.* **65**, 583–597 (2020).
- 921 81. Schul, J. & Patterson, A. C. What determines the tuning of hearing organs and the  
922 frequency of calls? A comparative study in the katydid genus *Neoconocephalus*

- 923 (Orthoptera, Tettigoniidae). *J. Exp. Biol.* **206**, 141–152 (2003).
- 924 82. Deily, J. A. & Schul, J. Spectral selectivity during phonotaxis: A comparative study in  
925 *Neoconocephalus* (Orthoptera: Tettigoniidae). *J. Exp. Biol.* **209**, 1757–1764 (2006).
- 926 83. Plotnick, R. O. Y. E. & Smith, D. M. Exceptionally preserved fossil insect ears from  
927 the Eocene Green River formation of Colorado. *J. Paleontol.* **86**, 19–24 (2012).
- 928 84. Greenwalt, D. E. & Rust, J. E. S. A new species of *Pseudotettigonia* Zeuner  
929 (Orthoptera: Tettigoniidae) with an intact stridulatory field and reexamination of the  
930 subfamily Pseudotettigoniinae. *Syst. Entomol.* **39**, 256–263 (2014).
- 931 85. Rust, J., Stumpner, A. & Gottwald, J. Singing and hearing in a Tertiary bushcricket.  
932 *Nature* **399**, 650 (1999).
- 933 86. Teeling, E. C. *et al.* A Molecular Phylogeny for Bats Illuminates Biogeography and  
934 the Fossil Record. *Science (80-. )*. **307**, 580 LP – 584 (2005).
- 935 87. Mugleston, J. D., Song, H. & Whiting, M. F. A century of paraphyly: a molecular  
936 phylogeny of katydids (Orthoptera: Tettigoniidae) supports multiple origins of leaf-  
937 like wings. *Mol. Phylogenet. Evol.* **69**, 1120–1134 (2013).
- 938 88. Mugleston, J. D., Naegle, M., Song, H. & Whiting, M. F. A Comprehensive Phylogeny  
939 of Tettigoniidae (Orthoptera: Ensifera) Reveals Extensive Ecomorph Convergence and  
940 Widespread Taxonomic Incongruence. *Insect Syst. Divers.* **2**, (2018).
- 941 89. Schneider, E. S., Römer, H., Robillard, T. & Schmidt, A. K. D. Hearing with  
942 exceptionally thin tympana: Ear morphology and tympanal membrane vibrations in  
943 eneopterine crickets. *Sci. Rep.* **7**, 1–12 (2017).
- 944 90. Vicente, N. *et al.* In and out of the Neotropics: historical biogeography of Eneopterinae  
945 crickets. *J. Biogeogr.* **44**, 2199–2210 (2017).



- 946 91. Hoy, R. R. The Evolution of Hearing in Insects as an Adaptation to Predation from  
947 Bats BT - The Evolutionary Biology of Hearing. in (eds. Webster, D. B., Popper, A.  
948 N. & Fay, R. R.) 115–129 (Springer New York, 1992). doi:10.1007/978-1-4612-2784-  
949 7\_8.
- 950 92. ter Hofstede, H. M. *et al.* Calling songs of Neotropical katydids (Orthoptera:  
951 Tettigoniidae) from Panama. *J. Orthoptera Res.* **29**, 137–201 (2020).
- 952 93. Lang, A. B. & Römer, H. Roost site selection and site fidelity in the neotropical  
953 katydid *Docidocercus gigliotosi* (Tettigoniidae). *Biotropica* **40**, 183–189 (2008).
- 954 94. Woodrow, C., Pulver, C., Veitch, D. & Montealegre-Z, F. Bioacoustic and biophysical  
955 analysis of a newly described highly transparent genus of predatory katydids from the  
956 Andean cloud forest (Orthoptera: Tettigoniidae: Meconematinae: Phlugidini).  
957 *Bioacoustics* **30**, 93–109 (2019).
- 958 95. Fullard, J. H., Morris, G. K. & Mason, A. C. Auditory processing in the black-sided  
959 meadow katydid *Conocephalus nigropleurum* (Orthoptera: Tettigoniidae). *J. Comp.*  
960 *Physiol. A* **164**, 501–512 (1989).
- 961 96. Harness, N. C. E. & Campbell, T. Acoustic ranging in meadow katydids: female  
962 preference for attenuated calls. *Bioacoustics* 1–10 (2021)  
963 doi:10.1080/09524622.2021.1879681.
- 964 97. Romer, H. & Lewald, J. High-frequency sound transmission in natural habitats:  
965 implications for the evolution of insect acoustic communication. *Behav. Ecol.*  
966 *Sociobiol.* **29**, 437–444 (1992).
- 967 98. Comsol. COMSOL Multiphysics. [www.comsol.com](http://www.comsol.com).
- 968 99. Courant, R., Friedrichs, K. & Lewy, H. On the Partial Difference Equations of

969 Mathematical Physics. *IBM J. Res. Dev.* **11**, 215–234 (1967).

970 100. Lenth, R. & Lenth, M. R. Package ‘lsmeans’. *Am. Stat.* **34**, 216–221 (2018).

971 101. Kuznetsova, A., Brockhoff, P. B. & Christensen, R. H. B. lmerTest Package: Tests in  
972 Linear Mixed Effects Models. *J. Stat. Software; Vol 1, Issue 13* (2017).

973 102. Team, R. C. R: A language and environment for statistical computing. (2021).

974

## 975 **Figure legends**

976 **Figure 1.** The ear of *Copiphora gorgonensis*. **a.** Location of the ear in the foreleg, external  
977 auditory input of *Copiphora gorgonensis*. **b.** 3D anatomy of the ear, with pinnae present; **c.** 3D  
978 anatomy of the following pinnae ablation, with the volume of the subslit cavities exhibited  
979 (light blue); **d.** 3D model of only the subslit cavities.

980

981 **Figure 2.** The effect of pinnae in the time domain and numerical simulations. **a.** Time plots  
982 from five incidence angles for the 60 kHz test sound illustrating changes in oscillation phase  
983 between the anterior (ATM) and posterior (PTM) tympana of the same ear. An anatomical  
984 cross section of the ear is shown with each tympanum (ATM and PTM), auditory vesicle (AV),  
985 posterior and anterior bifurcated tracheal branches (PT and AT), haemolymph channel (HC)  
986 and posterior and anterior pinnal structures (PP and AP). **b.** Mean arrival times (ms) of  
987 presented stimuli of 23, 40 and 60 kHz with and without the pinnae from time domain  
988 recordings of live experimental specimens ( $n = 9$  ears;  $df = 1711$ ). **c.** Mean displacement  
989 amplitudes (nm) of the tympanic membranes for each tested frequency (23, 40 and 60 kHz)  
990 with and without the presence of cuticular pinnae ( $n = 9$  ears;  $df = 1711$ ).. **d.** Cavity induced  
991 pressure gains (with pinnae) compared to sound pressure (dB) predictions with the pinnae

992 ablated from mathematical numerical models (17 ears; 10 females, 7 males). **e**. Simulated  
993 arrival times (ms) of selected frequencies (23, 40 and 60 kHz) using Comsol Multiphysics,  
994 v.5.6 (17 ears; 10 females, 7 males). For means comparison plots (**b – e**), significance symbols  
995 from post hoc analyses: ‘\*\*\*\*’ 0.001 ‘\*\*\*’ 0.01 ‘\*\*’ 0.05 ‘ns’ 0.1 ‘ ’ 1. Red bars with cuticular  
996 pinnae and blue bars without cuticular pinnae.

997

998 **Figure 3.** Acoustic experiments with 3D printed scaled ear models. **a**. Sound pressure gains  
999 (dB SPL) of 3D printed ears calculated from scaled time domain recordings for 23, 40, 60 and  
1000 110 kHz. Photos of 3D printed ear models with pinnae present (**b**) and ablated (**c**) and probe  
1001 microphone placement.

1002

1003 **Figure 4.** Panels **a**, **c**, and **e** depict cavity induced sound pressure distribution and gains with  
1004 pinnae, panels **b**, **d**, and **f** represent sound pressure gains without the pinnae. **a** and **b**. Cross –  
1005 section of the ear of *Copiphora gorgonensis* with the pinnal structures intact (**a**) and ablated  
1006 (**b**). Sound pressure intensities depicted with colours for simulations of 23, 40, 60 and 110  
1007 kHz. Low sound pressure dB (blue) to high sound pressure dB (red) distributions inside and  
1008 outside the cavities. **c** and **d** are plots of simulated sound pressure gains (dB SPL) in the  
1009 frequency ranges of 20 – 150 kHz for each tympanum. **e** and **f** are plots of relative dB gain of  
1010 the tympanal cavities in the 3D printed ears. ATM in red bars and PTM in blue bars.

1011

1012 **Figure 5.** Tympanal tuning and behavioral audiograms of *Copiphora gorgonensis*. **a**.  
1013 Vibrational responses to broadband chirps (20 – 120 kHz) of real tympanal membranes ( $n = 7$ ;  
1014 14 ears; 4 males and 3 females) of live *Copiphora gorgonensis*. Maxima resonance peaks at  
1015 near calling song frequency (23 kHz) and at 107.5 kHz. Blue bar for PTM and red bar for ATM.

1016 **b.** Black outline with grey shadow indicate the behavioural audiogram of ultrasound response  
1017 in nine female *C. gorgonensis* during waking, with auditory threshold scale in the right. Black  
1018 outline shows mean vector of SLP response at a particular frequency, shaded area represents  
1019 the standard deviation across measured SPL for each.

1020

1021 **Figure 6.** Ecological relevance of pinnae in *Copiphora gorgonensis*. Sound pressure level  
1022 gains (left) induced by the pinnae are present only at frequencies above c.a. 60 kHz, covering  
1023 the range of echolocation frequencies of five native insectivorous gleaning bat species. The  
1024 conspecific call of *C. gorgonensis* on the other hand ( $\text{dB}_{\text{peak}}$  at 23 kHz), is not enhanced by the  
1025 presence of the pinnae (dB loss). Dotted line indicates the frequency at which gain = 0 dB.  
1026 Spectrogram parameters: FFT size 512, Hamming window, 50% overlap; frequency resolution:  
1027 512 Hz, temporal resolution: 0.078 ms.

1028

1029

1030

1031

1032

1033

1034

1035

1036

1037

1038 **Figures**

1039 **Figure 1**

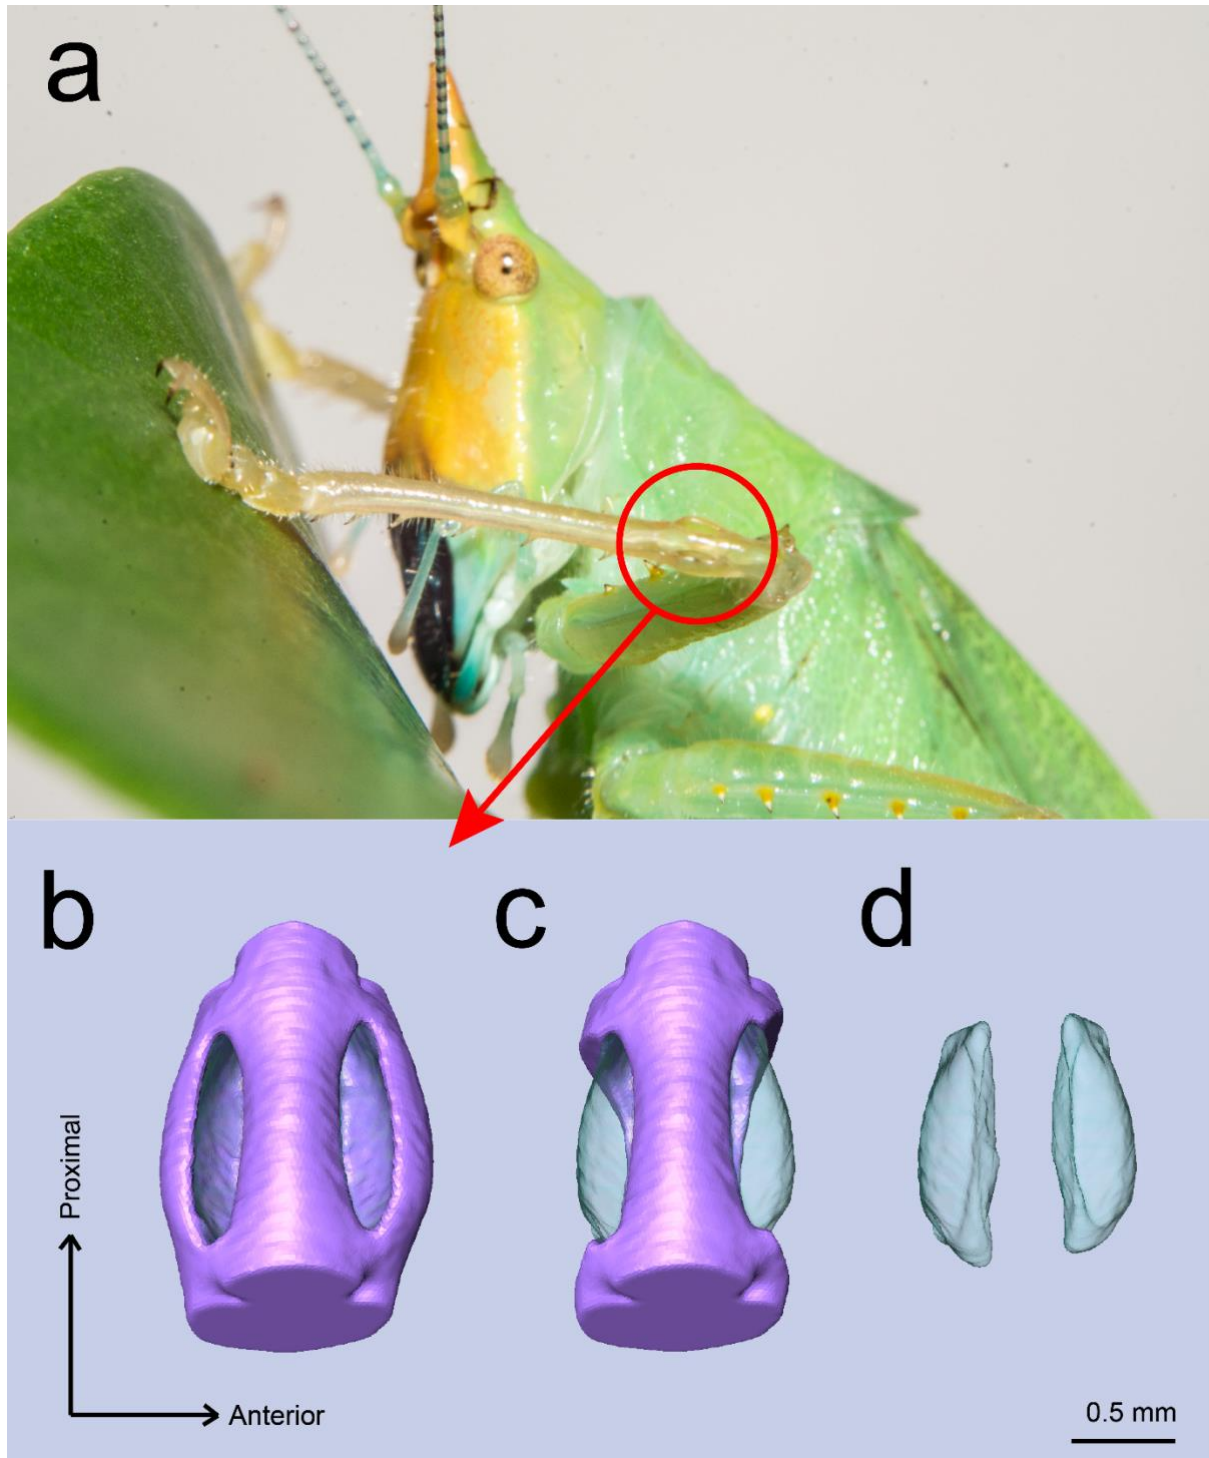

1040

1041

1042

1043 **Figure 2**

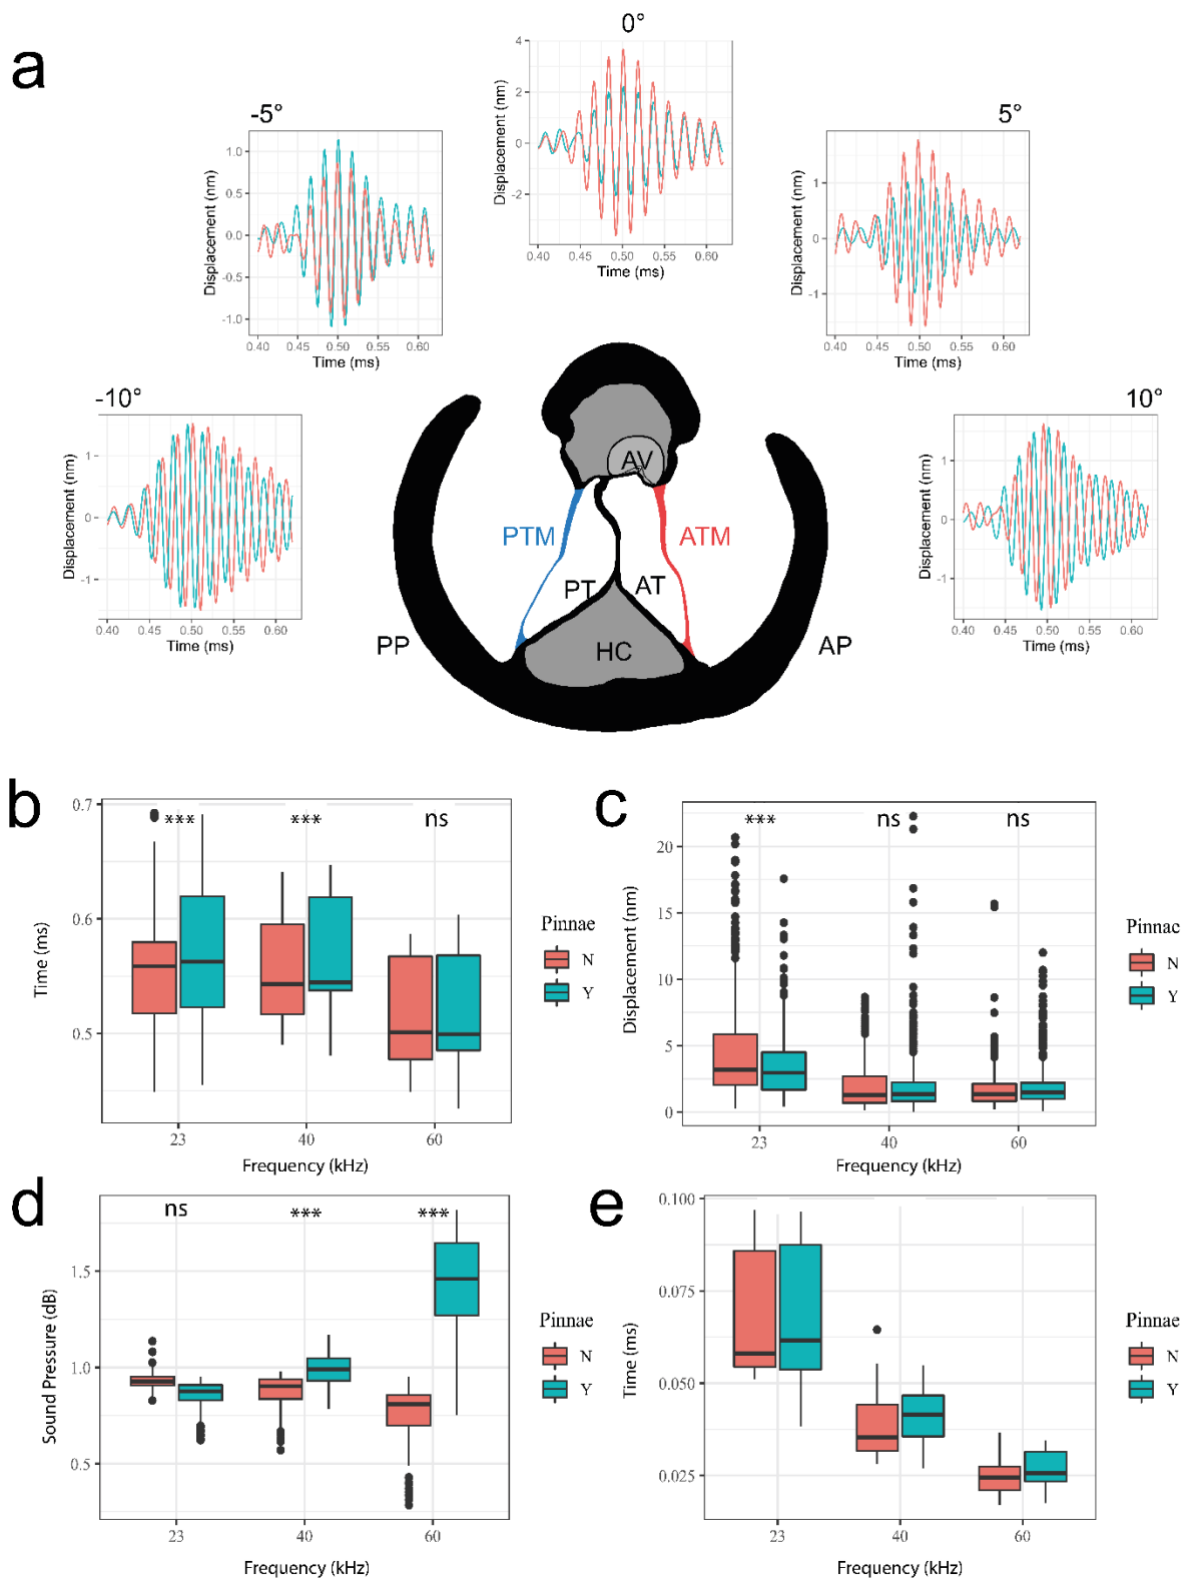

1044

1045

1046

1047 **Figure 3**

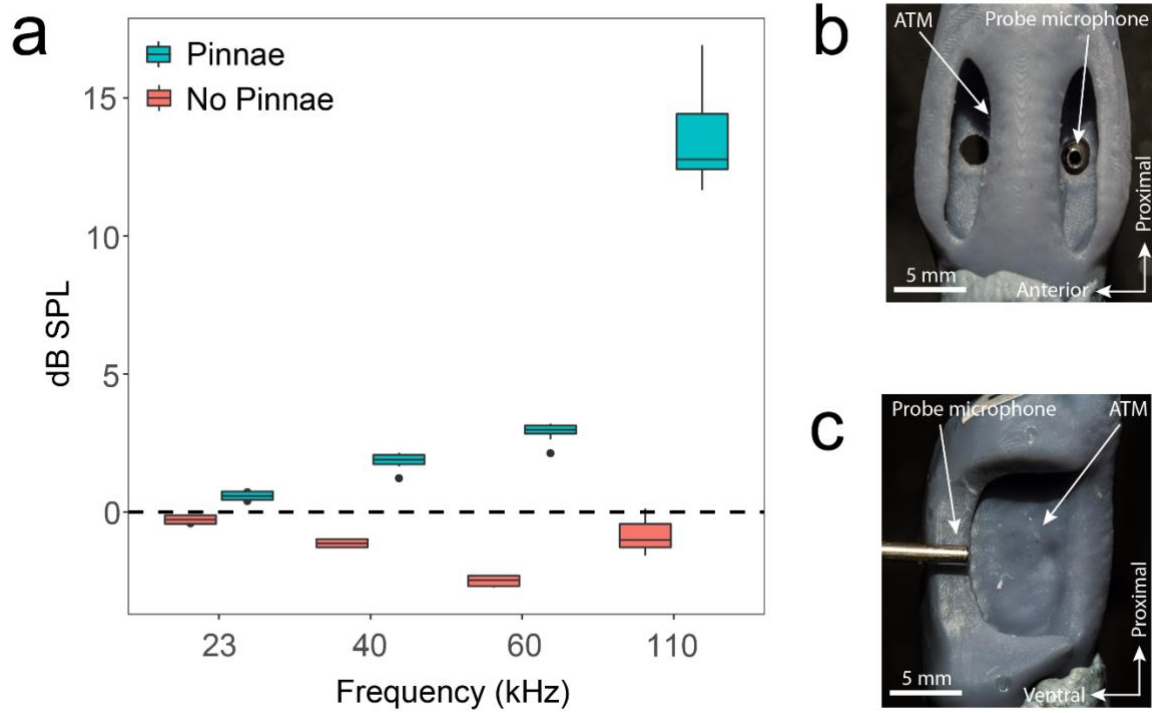

1048

1049

1050

1051

1052

1053

1054

1055

1056

1057



1058 **Figure 4**

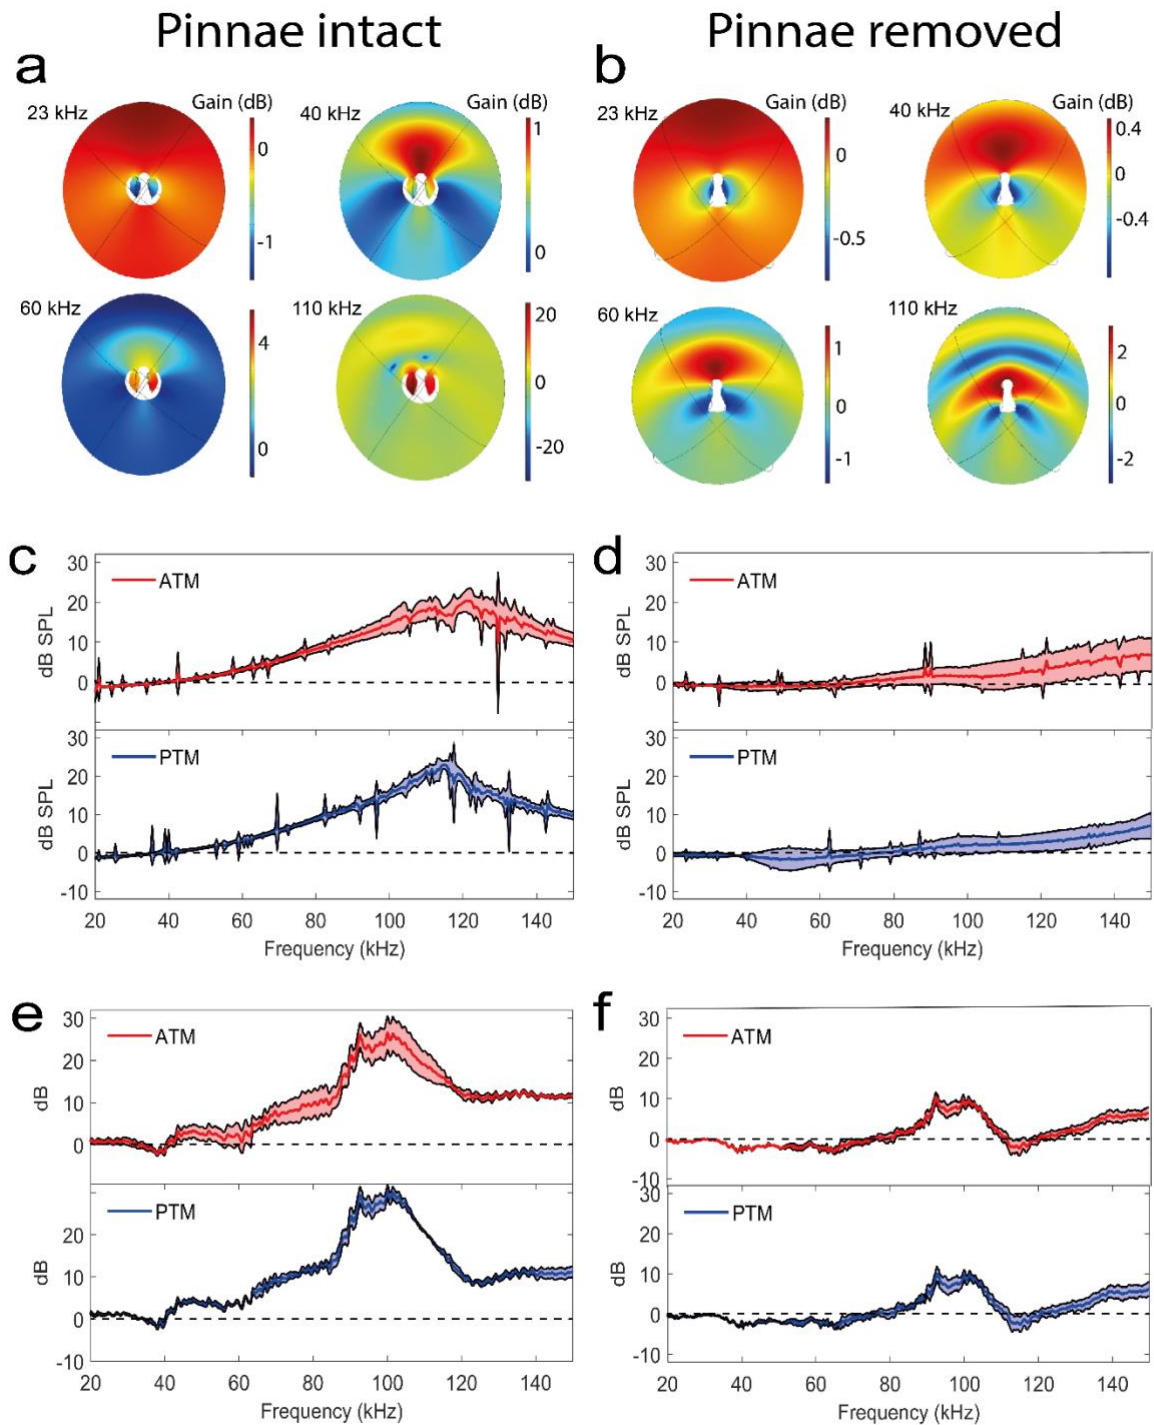

1059

1060

1061



1062 **Figure 5**

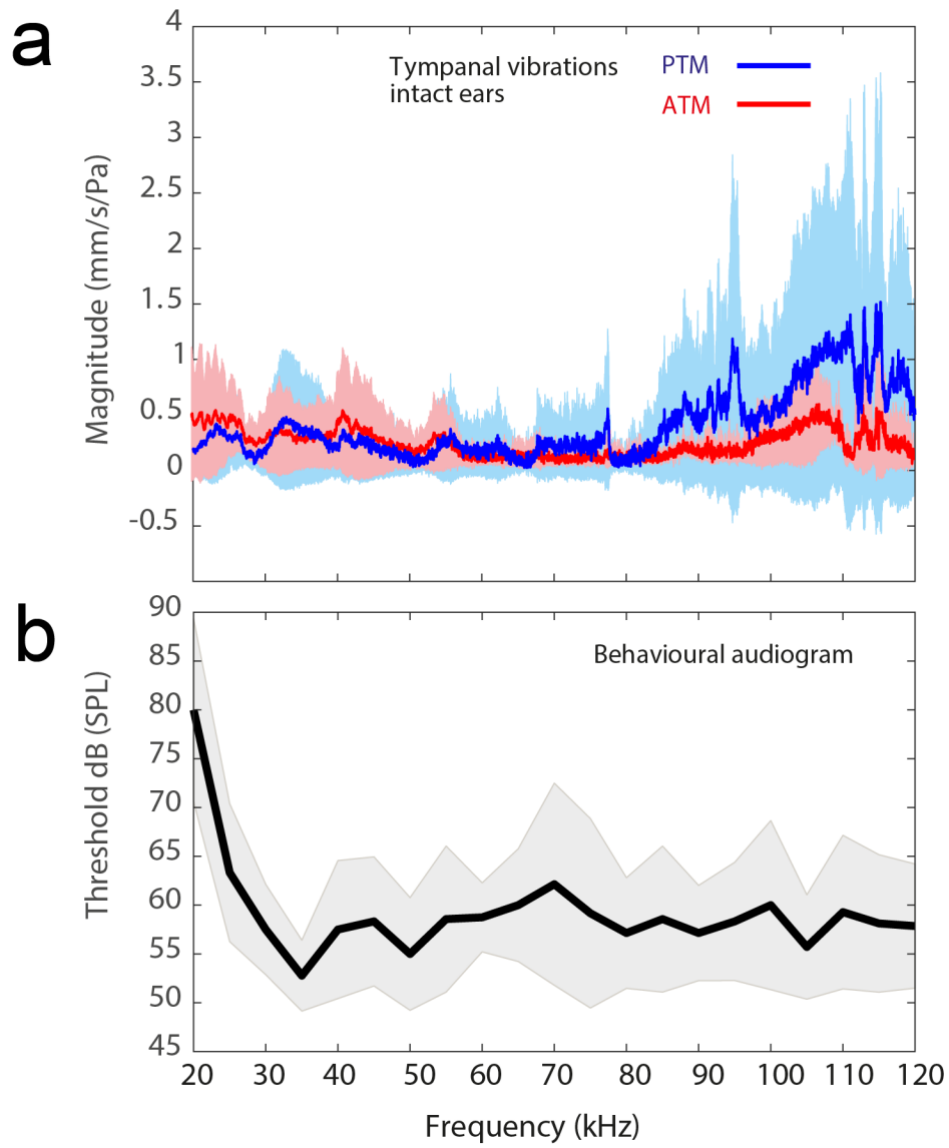

1063

1064

1065

1066

1067

1068

1069

1070 **Figure 6**

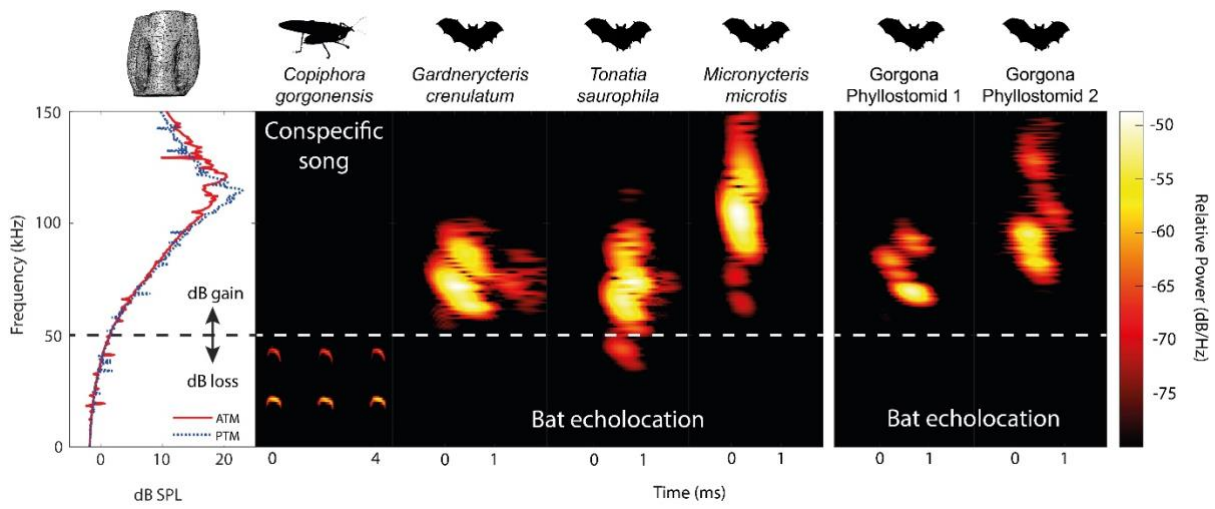

1071

1072

1073

1074

1075

1076

1077

1078

1079

1080

1081

1082

1083

1084
